# Supplementary material for: Local Management of Anogenital Warts in Non-Immunocompromised Adults: A Network Meta-Analysis of Randomized Controlled Trials
Source: Springer Nature journal article supplement (doi:10.1007/s13555-020-00357-z), 2020-02-06
Supplement: MOESM1 [file 17658698]

**To Supporting Information: Local management of anogenital warts  
in non-immunocompromised adults: a network meta-analysis of  
randomized controlled trials**

A. Bertolotti,<sup>1,2,3</sup> C. Ferdynus,<sup>3</sup> B. Milpied,<sup>4</sup> N. Dupin,<sup>5</sup> L. Huiart,<sup>3,6</sup> C. Derancourt<sup>2,7</sup>

<sup>1</sup>*Department of Infectious Disease, Saint-Pierre Hospital, Reunion Island, France*

<sup>2</sup>*EA 4537, Antilles-Guyane University, Martinique, France*

<sup>3</sup>*INSERM CICEC 1410, Reunion Island, France*

<sup>4</sup>*Department of Dermatology and Pediatric Dermatology, National Center for Rare Skin Disorders, Saint-André and Pellegrin Hospitals, Bordeaux, France*

<sup>5</sup>*Department of Dermatology, Cochin Hospital, Paris Descartes University, Paris, France*

<sup>6</sup>*Luxembourg Institute of Health, Department of Population Health, Luxembourg*

<sup>7</sup>*Department of dermatology, Hôpital de Briançon, Briançon, France.*

## **Supplement content**

**Appendix S1.** Keywords used to search databases

**Appendix S2.** Characteristics of RCTs included

**Appendix S3.** Reason for exclusion

**Appendix S4.** Risk of bias assessment

**Appendix S5. Network meta-analysis estimates (lower triangle) and direct estimates (upper triangle) of complete lesion response for all therapies.**

Treatments are reported in order of relative ranking for efficacy. Comparisons between treatments should be read from left to right. The relative risk of each comparison is in the cell in common between the column-defining treatment and the row-defining treatment. A relative risk (RR) above 1 favors the column-defining treatment for the network estimates and the row-defining treatment for the direct estimates. IFN = interferon. Data presented as RR (95% CI). Cryo: cryotherapy; ablative: ablative treatment (surgery or electrosurgery or CO2 laser or cryotherapy); imi: imiquimod 5%; 5-FU: 5 fluorouracil; 5-FU intra: intralesional 5 fluorouracil; TCA: trichloroacetic acid; podo: podophyllin 20-25%; citric ac: citric acid 9%; polyph: polyphenon 15%; podotox cr: podophyllotoxin 0.5% cream; podotox cr/gel: podophyllotoxin 0.5% gel + cream; podotox gel: podophyllotoxin 0.5% gel; PDT: photodynamic therapy; mycobac intra: intralesional mycobacterium; KOH: potassium

hydroxide; electro: electrosurgery; INF-1a intra: intralesional interferon-1 $\alpha$ ; INF-2b intra: intralesional interferon-2 $\beta$ .

**Appendix S6. Forest plot of the estimates of relative risk between each treatment and the reference placebo for complete lesion response. Sensitivity analyses: (A) Worst-case scenario, (B) Best-case scenario.**

Data presented as RR (95% CI). Cryo: cryotherapy; ablative: ablative treatment (surgery or electrosurgery or CO2 laser or cryotherapy); imi: imiquimod 5%; 5-FU: 5 fluorouracil; 5-FU intra: intralesional 5 fluorouracil; TCA: trichloroacetic acid; podo: podophyllin 20-25%; citric ac: citric acid 9%; polyph: polyphenon 15%; podotox cr: podophyllotoxin 0.5% cream; podotox cr/gel: podophyllotoxin 0.5% gel + cream; podotox gel: podophyllotoxin 0.5% gel; PDT: photodynamic therapy; mycobac intra: intralesional mycobacterium; KOH: potassium hydroxide; electro: electrosurgery; INF-1a intra: intralesional interferon-1 $\alpha$ ; INF-2b intra: intralesional interferon-2 $\beta$ .

**Appendix S7. Network meta-analysis estimates (lower triangle) and direct estimates (upper triangle) of complete lesion response for all therapies. Sensitivity analyses: Intention to treat.**

Treatments are reported in order of relative ranking for efficacy. Comparisons between treatments should be read from left to right. The relative risk of each comparison is in the cell in common between the column-defining treatment and the row-defining treatment. A relative risk (RR) above 1 favors the column-defining

treatment for the network estimates and the row-defining treatment for the direct estimates. IFN = interferon. Data presented as RR (95% CI). Cryo: cryotherapy; ablative: ablative treatment (surgery or electrosurgery or CO2 laser or cryotherapy); imi: imiquimod 5%; 5-FU: 5 fluorouracil; 5-FU intra: intralesional 5 fluorouracil; TCA: trichloroacetic acid; podo: podophyllin 20-25%; citric ac: citric acid 9%; polyph: polyphenon 15%; podotox cr: podophyllotoxin 0.5% cream; podotox cr/gel: podophyllotoxin 0.5% gel + cream; podotox gel: podophyllotoxin 0.5% gel; PDT: photodynamic therapy; mycobac intra: intralesional mycobacterium; KOH: potassium hydroxide; electro: electrosurgery; INF-1a intra: intralesional interferon-1 $\alpha$ ; INF-2b intra: intralesional interferon-2 $\beta$ .

**Appendix S8. Probabilities of treatment ranking. Sensitivity analyses: (A) Worst-case scenario, (B) Best-case scenario.**

SUCRA: surface under the cumulative ranking curve. Cryo: cryotherapy; ablative: ablative treatment (surgery or electrosurgery or CO2 laser or cryotherapy); imi: imiquimod 5%; 5-FU: 5 fluorouracil; 5-FU intra: intralesional 5 fluorouracil; TCA: trichloroacetic acid; podo: podophyllin 20-25%; citric ac: citric acid 9%; polyph: polyphenon 15%; podotox cr: podophyllotoxin 0.5% cream; podotox cr/gel: podophyllotoxin 0.5% gel + cream; podotox gel: podophyllotoxin 0.5% gel; PDT: photodynamic therapy; mycobac intra: intralesional mycobacterium; KOH: potassium hydroxide; electro: electrosurgery; INF-1a intra: intralesional interferon-1 $\alpha$ ; INF-2b intra: intralesional interferon-2 $\beta$ .

## **Appendix S1:** Search terms used to screen all databases

### **MEDLINE and Web of Science**

- 1 hpv.all
- 2 papillomavirus.all.
- 3 acuminat\*.all.
- 4 condyloma\*.all.
- 5 wart\*.all.
- 6 genital wart\*.all.
- 7 or/1-6
- 8 randomized controlled trial.all.
- 9 controlled clinical trial.all.
- 10 random\*.all.
- 11 placebo.all.
- 12 clinical trial\*.all.
- 13 trial.all.
- 14 or/8-13
- 15 7 AND 14
- 16 hand.all.
- 17 foot.all.
- 18 feet.all.
- 19 animal\*.all.
- 20 nonhuman\*.all.
- 21 child\*.all.
- 22 cancer\*.all.
- 23 neoplasia\*.all.
- 24 cervical.all.
- 25 larynx\*.all.
- 26 vacci\*.all.
- 27 tumor.all.
- 28 verruc\*.all.
- 29 or/ 16-28
- 30 15 NOT 29

### **SCOPUS.com**

- #1.1 wart\*:ab,ti
- #1.2 condylom\*:ab,ti
- #1.3 acuminat\*:ab,ti
- #1.4 verruc\*:ab,ti
- #1.5 hpv:ab,ti
- #1.6 papillomavirus\*:ab,ti
- #1.7 genital wart\* :ab,ti
- #1.8 condylomata acuminata : ab,ti
- #1.9 wart virus:ab,ti
- #1.10 #1.1 OR #1.2 OR #1.3 OR #1.4 OR #1.5 OR #1.6 OR #1.7 OR #1.8 OR #1.9
- #1.11 clinical trial:ab,ti
- #1.12 random\*:ab,ti
- #1.13 randomized controlled trial;ab,ti
- #1.14 controlled clinical:ab,ti
- #1.15 placebo\*:ab,ti

#1.16 trial:ab,ti  
#1.17 #1.11 OR #1.12 OR #1.13 OR #1.14 OR #1.15 OR #1.16  
#1.18 #1.10 AND #1.17  
#1.19 hand:ab,ti  
#1.20 foot:ab,ti  
#1.21 feet:ab,ti  
#1.22 animal\*:ab,ti  
#1.23 nonhuman\*:ab,ti  
#1.24 child\*:ab,ti  
#1.25 cancer\*:ab,ti  
#1.26 neoplasia\*:ab,ti  
#1.27 cervical:ab,ti  
#1.28 larynx\*:ab,ti  
#1.29 vacci\*:ab,ti  
#1.30 tumor:ab,ti  
#1.31 verruc\*:ab,ti  
#1.32 #1.19 OR #1.20 OR #1.21 OR #1.22 OR #1.23 OR #1.24 OR #1.25 OR #1.26  
OR #1.27 OR #1.28 OR #1.29 OR #1.30 OR #1.31  
#1.33 #1.18 AND NOT #1.32

### **LILACS**

(tw:(condylom\*)) AND (tw:(Randomi\*))

### **Ovid Platform**

(condyloma OR acuminat OR wart) AND (clinical trial OR trial OR randomized trial  
OR randomized controlled trial OR controlled clinical OR placebo OR Randomized  
OR randomly)

### **Cochrane Library**

(condyloma OR acuminata OR wart ) and (randomized controlled trial OR controlled  
clinical trial OR random OR placebo OR clinical trial) not (hand OR foot OR feet OR  
animal OR nonhuman OR child OR cancer OR neoplasia OR cervical OR larynx OR  
vacci OR tumor OR verruc) in Trials

### **Cochrane Register and International Clinical Trials Registry Platform (ICTRP):**

Using the terms: warts, condylomas, condyloma, genital warts in title, abstract and  
keywords.

### **Clinical Trials**

Wart OR condylomas OR condyloma OR genital warts OR acuminata

### **EM-PREMIUM bibliography from 2010 in title and abstract:**

English and french request: condylo\*

English request: anogenital wart\*

French request: verrue anogénitale\*

### **Open Grey, SUDOC (title) and BABORD + bibliography (in French):**

Condylome

Verrue

## Appendix S2: Characteristics of RCTs included

| Reference                          | Country | Intervention             | No. of Patients randomized (analyzed) | Frequency                                                      | Modalities                                                                        | Follow-Up (mo) | Outcomes                                                              | Comments                                                                     |
|------------------------------------|---------|--------------------------|---------------------------------------|----------------------------------------------------------------|-----------------------------------------------------------------------------------|----------------|-----------------------------------------------------------------------|------------------------------------------------------------------------------|
| Abdullah 1993 <sup>1</sup>         | UK      | Cryo                     | 53 (43)                               | 1×/wk, maximum 6 wk                                            | Applied with a cotton Q-tip until wart is frozen with 1-mm margin, 2×             | 3              | Clearance after 6 wk, side effects                                    | 1 <sup>st</sup> treatment                                                    |
| Akhavan 2014 <sup>2</sup>          | Iran    | TCA                      | 33 (30)                               | Same                                                           | A pointed plastic probe                                                           | 8              | Clearance after 8 wk, recurrence after 3 mo, recurrence after 6 mo    | 1 <sup>st</sup> treatment, only women                                        |
|                                    |         | Podophyllin 20%          | 42 (38)                               | 1×/wk, maximum 8 wk                                            | NR                                                                                |                |                                                                       |                                                                              |
|                                    |         | Imiquimod                | 42 (37)                               | 3×/wk, maximum 8 wk                                            | Same                                                                              |                |                                                                       |                                                                              |
| Arıcan 2004 <sup>3</sup>           | Turkey  | Cryo                     | 42 (36)                               | 1×; no other information given                                 | Same                                                                              | 9              | Clearance after 3 mo, recurrence after 6 mo, side effects             | ITT modified                                                                 |
|                                    |         | Imiquimod 5%             | 34 (33)                               | 3×/wk, maximum 12 wk                                           | Applied with the tip of the stick and then cleaned with abundant amounts of water |                |                                                                       |                                                                              |
| Azizjalali 2012 <sup>4</sup>       | Iran    | Placebo                  | 11 (10)                               | Same                                                           | Same                                                                              | 3              | Clearance after 6 wk, recurrence after 3 mo, side effects             | ITT                                                                          |
|                                    |         | CO <sub>2</sub> laser    | 80 (80)                               | 1× every 2 wk, maximum 6 wk                                    | Local anesthesia, 30 W, 10,600 nm, 4.5 J/cm <sup>2</sup>                          |                |                                                                       |                                                                              |
| Baker 2011 <sup>5</sup>            | USA     | Cryo                     | 80 (80)                               | Same                                                           | 2 freezing cycles                                                                 | 4              | Clearance after 4 mo, side effects                                    | ITT, only women                                                              |
|                                    |         | Imiquimod 2.5%           | 202 (139)                             | 1×/d for 8 wk                                                  | Wash after 8 hr                                                                   |                |                                                                       |                                                                              |
| Benedetti Panici 1989 <sup>6</sup> | Italy   | Imiquimod 3.75%          | 204 (149)                             | Same                                                           | Same                                                                              | 12             | Clearance after 1 mo, recurrence after 2.6 mo, side effects           | ITT, only women, some patients with AGWs on cervix; IFN arm (data not shown) |
|                                    |         | Placebo                  | 105 (77)                              | Same                                                           | Same                                                                              |                |                                                                       |                                                                              |
|                                    |         | Electro                  | 51 (51)                               | Until apparent elimination of the genital wart, interval: 3 wk | Local anesthesia, diathermocoagulation with bipolar electrodes                    |                |                                                                       |                                                                              |
| Beutner 1989 <sup>7</sup>          | USA     | Placebo                  | 48 (48)                               | NR                                                             | NR                                                                                | 4              | Clearance after 6 wk, recurrence after 10 wk, side effects, new warts | ITT, only men                                                                |
|                                    |         | Podophyllotoxin 0.5% gel | 56 (56)                               | 2×/d, 3 consecutive d, maximum 4 wk                            | NR                                                                                |                |                                                                       |                                                                              |
|                                    |         | Placebo                  | 53 (53)                               | Same                                                           | Same                                                                              |                |                                                                       |                                                                              |

Appendix S2: Characteristics of RCTs included (continued)

| Reference                      | Country | Intervention                 | No. of Patients randomized (analyzed) | Frequency                     | Modalities                                                                                          | Follow-Up (mo) | Outcomes                                                                                                                     | Comments                                                                   |
|--------------------------------|---------|------------------------------|---------------------------------------|-------------------------------|-----------------------------------------------------------------------------------------------------|----------------|------------------------------------------------------------------------------------------------------------------------------|----------------------------------------------------------------------------|
| Beutner 1998 <sup>8</sup>      | USA     | Imiquimod 5%                 | 94 (69)                               | 1×/d, maximum 16 wk           | Wash after 8 hr with soap and water                                                                 | 7              | Clearance after 8, 12, 16 wk, recurrence after 3 mo, side effects, partial clearance, time for complete clearance, new warts | ITT                                                                        |
|                                |         | Imiquimod 1%                 | 90 (71)                               | Same                          | Same                                                                                                |                |                                                                                                                              |                                                                            |
|                                |         | Placebo                      | 95 (67)                               | Same                          | Same                                                                                                |                |                                                                                                                              |                                                                            |
| Bilensoy 2011 <sup>9</sup>     | Turkey  | Placebo                      | 6 (6)                                 | 3×/wk, 1 wk/2, maximum 12 wk  | Applied with a cotton-tipped swab                                                                   | 6              | Clearance after 12 wk, recurrence after 3 mo, partial clearance                                                              | ITT, only women; both 5-FU arms used with cyclodextrin thermosensitive gel |
|                                |         | 5-FU cream                   | 14 (14)                               | Same                          | Same                                                                                                |                |                                                                                                                              |                                                                            |
|                                |         | Placebo intra-lesional       | 6 (6)                                 | Same                          | NR                                                                                                  |                |                                                                                                                              |                                                                            |
| Bornstein 1997 <sup>10</sup>   | Israel  | 5-FU intra-lesional          | 18 (18)                               | Same                          | Same                                                                                                | 6              | Clearance after 12 wk, recurrence after 3 mo, partial clearance, time to complete clearance                                  | ITT                                                                        |
|                                |         | IFNβ-1a intra-lesional 1 MIU | 30 (30)                               | 3×/wk, maximum 3 wk           | NR                                                                                                  |                |                                                                                                                              |                                                                            |
|                                |         | Placebo intra-lesional       | 30 (30)                               | Same                          | Same                                                                                                |                |                                                                                                                              |                                                                            |
| Camargo 2014 <sup>11</sup>     | Brazil  | KOH                          | 24 (20)                               | 1×/d, maximum 12 wk           | Applied with a cotton wrapped toothpick                                                             | 3              | Clearance after 12 wk, recurrence after 1 mo, side effects, time to complete clearance                                       | 1 <sup>st</sup> treatment, only men                                        |
|                                |         | Cryo                         | 24 (22)                               | Every 2 wk, maximum 12 wk     | Freezing 1× 5-20 s                                                                                  |                |                                                                                                                              |                                                                            |
| Carpiniello 1988 <sup>12</sup> | NR      | CO <sub>2</sub> laser        | 41 (NR)                               | NR                            |                                                                                                     | 4              | Clearance after treatment, recurrence after 4 mo                                                                             | Only men                                                                   |
|                                |         | CO <sub>2</sub> laser + 5-FU | 27 (NR)                               | 5-FU every night maximum 30 d | 5-FU initiated 1 wk after CO <sub>2</sub> laser                                                     |                |                                                                                                                              |                                                                            |
| Chen 2007 <sup>13</sup>        | China   | CO <sub>2</sub> laser        | 21 (21)                               | 1×/wk for 3 wk if not removed | topical anesthesia with 2% lidocaine                                                                | 3              | Clearance after 3 wk, recurrence after 2 mo, side effects                                                                    | ITT, no quantification for side effects                                    |
|                                |         | PDT                          | 65 (65)                               | Same                          | ALA dissolved in sterile 0.9% NaCl just before application, 3 hr before light illumination (632 nm) |                |                                                                                                                              |                                                                            |



---

Appendix S2: Characteristics of RCTs included (continued)

---

| Reference                   | Country                                               | Intervention                          | No. of Patients randomized (analyzed) | Frequency                              | Modalities                                        | Follow-Up (mo) | Outcomes                                                                             | Comments      |
|-----------------------------|-------------------------------------------------------|---------------------------------------|---------------------------------------|----------------------------------------|---------------------------------------------------|----------------|--------------------------------------------------------------------------------------|---------------|
| Claesson 1996 <sup>14</sup> | Sweden, Finland, France                               | Podophyllotoxin 0.15% cream           | 60 (60)                               | 2×/d for 3 consecutive d, maximum 4 wk |                                                   | 4              | Clearance after 4 wk, recurrence after 3 mo, side effects                            | ITT           |
|                             |                                                       | Podophyllotoxin 0.3% cream            | 60 (60)                               | Same                                   |                                                   |                |                                                                                      |               |
|                             |                                                       | Podophyllotoxin 0.5% sol              | 60 (60)                               | Same                                   |                                                   |                |                                                                                      |               |
| Duus 1985 <sup>15</sup>     | Denmark                                               | CO <sub>2</sub> laser                 | 25 (21)                               | 1×, maximum 2×                         | Continuous wave (5-20 W), spot diameter of 0-7 mm | 6              | Clearance after treatment, recurrence after 3 mo, side effects                       |               |
|                             |                                                       | Ablative treatment (surgery, Electro) | 25 (23)                               | 1×, maximum 2×                         | NR                                                |                |                                                                                      |               |
| Edwards 1998 <sup>16</sup>  | Multicentric: Hawaii, New York, Pennsylvania & Canada | Imiquimod 5%                          | 109 (90)                              | 3×/wk for 16 wk                        | Wash after 6-10 hr with soap and water            | 7              | Clearance after 4 mo, recurrence after 3 mo, side effects, partial clearance         | ITT           |
|                             |                                                       | Imiquimod 1%                          | 102 (71)                              | Same                                   | Same                                              |                |                                                                                      |               |
| Edwards 1988 <sup>17</sup>  | UK                                                    | Placebo                               | 100 (73)                              | Same                                   | Same                                              | 6              | Clearance after 6 wk, side effects                                                   | ITT, only men |
|                             |                                                       | Podophyllotoxin 0.5% sol              | 32 (32)                               | 2×/d for 3 consecutive d, maximum 6 wk | Self-applied                                      |                |                                                                                      |               |
|                             |                                                       | Podophyllin 20%                       | 19 (19)                               | 1×/wk, maximum 6 wk                    | Provider-applied                                  |                |                                                                                      |               |
| Eron 1986 <sup>18</sup>     | USA                                                   | IFNα-2b (1 MIU) intra-lesional        | 147 (125)                             | NR                                     | NR                                                | 7              | Clearance after 4,16 wk; recurrence after 3 mo, side effects                         |               |
|                             |                                                       | Placebo intra-lesional                | 149 (132)                             | Same                                   | Same                                              |                |                                                                                      |               |
| Gabriel 1983 <sup>19</sup>  | UK                                                    | Podophyllin 25%                       | 38 (29)                               | 1×/wk, maximum 6 wk                    | Applied with the tip of the stick                 | 3              | Clearance after 6 wk, recurrence after 6 wk, side effect, time to complete clearance | Only men      |
|                             |                                                       | Podophyllin 25% + TCA 50%             | 35 (31)                               | Same                                   | Same                                              |                |                                                                                      |               |

---

---

Appendix S2: Characteristics of RCTs included (continued)

---

| Reference                    | Country          | Intervention                       | No. of Patients randomized (analyzed) | Frequency                                                                           | Modalities                           | Follow-Up (mo) | Outcomes                                                                                         | Comments                 |
|------------------------------|------------------|------------------------------------|---------------------------------------|-------------------------------------------------------------------------------------|--------------------------------------|----------------|--------------------------------------------------------------------------------------------------|--------------------------|
| Gilson 2009 <sup>20</sup>    | UK               | Cryo + placebo                     | 75 (40)                               | Cream 2×/d for 3 consecutive d, maximum 4 wk, Cryo: 45-s freezing/wk, maximum 12 wk | NR                                   | 9              | Clearance after 3 mo, recurrence after 3 mo, side effects                                        | ITT modified             |
|                              |                  | Cryo + podophyllotoxin 0.15% cream | 74 (31)                               | Same                                                                                | Same                                 |                |                                                                                                  |                          |
| Godley 1987 <sup>21</sup>    | UK               | TCA                                | 69 (57)                               | 1×/wk maximum 10 wk                                                                 | Applied with an orange stick         | 4,5            | Clearance after 10 wk; recurrence after 2 mo, side effects, time to complete clearance           | Only men                 |
|                              |                  | Cryo                               | 61 (49)                               | Same                                                                                | Freeze for 15 sec twice              |                |                                                                                                  |                          |
| Greenberg 1991 <sup>22</sup> | USA              | Podophyllotoxin 0.5% sol & cream   | 48 (48)                               | 2×/d for 3 consecutive d, maximum 4 wk                                              | Applied with a cotton tip            |                | Clearance after 4 wk; recurrence after 2 mo, distinctive side effects for gel & cream, new warts | ITT modified, only women |
| Gross 2007 <sup>23</sup>     | Germany & Russia | Placebo                            | 24 (21)                               | Same                                                                                | Same                                 | 6              | Clearance after 12 wk, recurrence after 3 mo, side effects                                       |                          |
|                              |                  | Polyphenon 15%                     | 80 (46)                               | 3×/d, maximum 16 wk                                                                 | NR                                   |                |                                                                                                  |                          |
| Hellberg 1995 <sup>24</sup>  | Sweden           | Polyphenon 10%                     | 79 (36)                               | Same                                                                                | Same                                 | 4              | Clearance after 4 wk; recurrence after 3 mo, side effects                                        | Only women               |
|                              |                  | Placebo                            | 83 (31)                               | Same                                                                                | Same                                 |                |                                                                                                  |                          |
| Isik 2014 <sup>25</sup>      | Turkey           | Podophyllotoxin 0.5% cream         | 30 (28)                               | 2×/d for 3 consecutive d, maximum 4 wk                                              | NR                                   | 6              | Clearance after 3 mo, recurrence after 3 mo, partial clearance                                   | ITT                      |
|                              |                  | Podophyllin 20%                    | 30 (27)                               | 1×/wk, maximum 4 wk                                                                 | Wash 4 hr after application          |                |                                                                                                  |                          |
|                              |                  | KOH                                | 30 (30)                               | 1×/d for 12 wk                                                                      | Perilesional application of Vaseline |                |                                                                                                  |                          |
|                              |                  | 5-FU + salicylic acid              | 30 (30)                               | Same                                                                                | Same                                 |                |                                                                                                  |                          |

---

Appendix S2: Characteristics of RCTs included (continued)

| Reference                    | Country | Intervention                        | No. of Patients randomized (analyzed) | Frequency                              | Modalities                                                                                                                                                 | Follow-Up (mo) | Outcomes                                                                                                  | Comments                       |
|------------------------------|---------|-------------------------------------|---------------------------------------|----------------------------------------|------------------------------------------------------------------------------------------------------------------------------------------------------------|----------------|-----------------------------------------------------------------------------------------------------------|--------------------------------|
| Jensen 1985 <sup>26</sup>    | Denmark | Podophyllin 25%                     | 30 (30)                               | 1×/wk, maximum 6 wk                    | Wash after 6 hr                                                                                                                                            | 12             | Clearance after 4 wk; recurrence after 1.5, 4.5, 10.5 mo; side effects, time to complete clearance        | ITT                            |
|                              |         | Surgery                             | 30 (30)                               | Same                                   | Local anesthesia with lignocaine                                                                                                                           |                |                                                                                                           |                                |
| Keay 1988 <sup>27</sup>      | USA     | IFNα cream                          | 32 (31)                               | 3×/d, maximum 4 wk                     | Applied topically by gentle 30-s rubbing                                                                                                                   | 4              | Clearance after 4, 16 wk, side effects                                                                    | ITT modified, only women       |
|                              |         | Placebo                             | 33 (30)                               | Same                                   | Same                                                                                                                                                       |                |                                                                                                           |                                |
| Khawaja 1989 <sup>28</sup>   | UK      | Podophyllin 25%                     | 19 (19)                               | 1×/wk, maximum 6 wk                    | Wash after 6 hr                                                                                                                                            | 10.5           | Clearance after 6 wk, recurrence after 3, 9 mo; side effect, time to complete clearance                   | ITT, 1 <sup>st</sup> treatment |
|                              |         | Surgery                             | 18 (18)                               | 1×                                     | Local anesthesia with lignocaine                                                                                                                           |                |                                                                                                           |                                |
| Kinghorn 1993 <sup>29</sup>  | UK      | Podophyllotoxin 0.5% sol            | 168 (138)                             | 2×/d for 3 consecutive d, maximum 5 wk |                                                                                                                                                            | 3              | Clearance after 54 wk; recurrence after 2 mo, side effects                                                |                                |
|                              |         | Podophyllin 25%                     | 84 (62)                               | 2×/wk, maximum 5 wk                    | Wash off after 4 hr                                                                                                                                        |                |                                                                                                           |                                |
| Kirby 1990 <sup>30</sup>     | USA     | Podophyllotoxin 0.5% sol            | 19 (19)                               | 2×/d for 3 consecutive d, maximum 4 wk | NR                                                                                                                                                         | 4              | Clearance after 4 wk; recurrence after 3 mo, side effects                                                 | ITT                            |
|                              |         | Placebo                             | 19 (19)                               | Same                                   | Same                                                                                                                                                       |                |                                                                                                           |                                |
| Komericki 2011 <sup>31</sup> | Austria | Podophyllotoxin 0.5% sol            | 26 (25)                               | 2×/d for 3 consecutive d, maximum 4 wk | NR                                                                                                                                                         | 4              | Clearance after 4 wk for podophyllotoxin and 16 wk for imiquimod, side effects                            | 1 <sup>st</sup> treatment      |
|                              |         | Imiquimod 5%                        | 25 (20)                               | 3×/wk maximum 16 wk                    | Same                                                                                                                                                       |                |                                                                                                           |                                |
| Kumar 2014 <sup>32</sup>     | India   | Imiquimod 5%                        | 44 (41)                               | 3×/wk, maximum 16 wk                   | Intradermal injections of the Mw vaccine and vehicle on both shoulders at baseline to sensitize and improve local immune response to intralesional therapy | 8              | Clearance after 20 wk; recurrence after 3 mo, side effects, time to complete clearance, partial clearance | ITT                            |
|                              |         | <i>Mycobacterium</i> intra-lesional | 45 (39)                               | Every 2 wk, maximum 16 wk              | –                                                                                                                                                          |                |                                                                                                           |                                |

---

Appendix S2: Characteristics of RCTs included (continued)

---

| Reference                       | Country | Intervention                          | No. of Patients randomized (analyzed) | Frequency                                                   | Modalities                                                                                 | Follow-Up (mo) | Outcomes                                                                                      | Comments      |
|---------------------------------|---------|---------------------------------------|---------------------------------------|-------------------------------------------------------------|--------------------------------------------------------------------------------------------|----------------|-----------------------------------------------------------------------------------------------|---------------|
| Lacey 2003 <sup>33</sup>        | UK      | Podophyllin 25%                       | 116 (96)                              | 2×/wk, maximum 4 wk                                         | In the clinic                                                                              | 4              | Clearance after 4 wk; recurrence after 3 mo, side effects, cost/efficacy ratio                |               |
|                                 |         | Podophyllotoxin 0.15% cream           | 118 (82)                              | 2×/d for 3 consecutive d, maximum 4 wk                      | NR                                                                                         |                |                                                                                               |               |
|                                 |         | Podophyllotoxin 0.5% sol              | 120 (98)                              | Same                                                        | Same                                                                                       |                |                                                                                               |               |
| Lassus 1987 <sup>34</sup>       | Finland | Podophyllotoxin 0.5% sol              | 48 (48)                               | 2×/d for 3 consecutive d, maximum 4 wk                      | At home                                                                                    | 3              | Clearance after 4 wk; recurrence after 2 mo                                                   | ITT, only men |
|                                 |         | Podophyllin 20%                       | 52 (52)                               | 1×/wk, maximum 4 wk                                         | In the clinic                                                                              |                |                                                                                               |               |
| Lottfabadi 2015 <sup>35</sup>   | Iran    | Cryo                                  | 34 (34)                               | Every 2 wk, maximum 12 wk                                   | Freeze with 1-mm margin, 10-15 s                                                           | 6              | Clearance 1 mo after 12 wk of treatment; recurrence after 2 mo; side effects                  |               |
|                                 |         | TCA                                   | 34 (34)                               | Same                                                        | Applied by an applicator then washed                                                       |                |                                                                                               |               |
| Mahajan 2014 <sup>36</sup>      | India   | Cryo + podophyllin 20%                | 30 (24)                               | Cryo once & podo every 2 wk                                 | Cryo: freezing with a 5-mm margin from a distance of 2-mm<br>Podo: Wash 3 hr after therapy | 6              | Clearance after 8, 12, 24 wk; recurrence after 1 mo; side effects; time to complete clearance |               |
|                                 |         | Bleomycin + placentrex intra-lesional | 30 (25)                               | Bleomycin every 2 wk, maximum 10 wk; placentrex every night | After bleomycin, ice water soaks twice daily for 4 d                                       |                |                                                                                               |               |
| Mazurkiewicz 1990 <sup>37</sup> | Poland  | Podophyllin 20%                       | 16 (13)                               | Once/wk, maximum 6 wk                                       | Doctor-applied                                                                             | 1,5            | Clearance after 6 wk, side effects                                                            |               |
|                                 |         | Podophyllotoxin 0.5% sol              | 16 (14)                               | 2×/d for 3 consecutive d, maximum 6 wk                      | Patient-applied                                                                            |                |                                                                                               |               |
|                                 |         | Podophyllotoxin 0.5% cream            | 22 (16)                               | Same                                                        | Same                                                                                       |                |                                                                                               |               |

---

Appendix S2: Characteristics of RCTs included (continued)

| Reference                   | Country                                               | Intervention                         | No. of Patients randomized (analyzed) | Frequency                                            | Modalities                                                                     | Follow-Up (mo) | Outcomes                                                                                                     | Comments                                            |
|-----------------------------|-------------------------------------------------------|--------------------------------------|---------------------------------------|------------------------------------------------------|--------------------------------------------------------------------------------|----------------|--------------------------------------------------------------------------------------------------------------|-----------------------------------------------------|
| Nath 1990 <sup>38</sup>     | India                                                 | Podophyllin 25%                      | 50 (47)                               | 1×/wk, maximum 12 wk                                 | Wash after 2 hr                                                                | 6              | Clearance after 3 mo, recurrence after 3 mo, time to complete clearance                                      | Incompletely randomization (pregnant women got TCA) |
| On 2014 <sup>39</sup>       | USA                                                   | TCA 50%<br>Polyphenon 15%<br>+ cryo  | 50 (48)<br>21 (NR)                    | Same<br>Polyphenon:<br>2×/d, maximum 16 wk; Cryo: 1× | Applied with a swab stick<br>Cryo: 2 5-s cycles/5-s interval rest              | 16             | Clearance after 9 & 17 wk, side effects, partial clearance                                                   | ITT                                                 |
| Ormerod 2015 <sup>40</sup>  | Germany, UK, Holland, Switzerland, Poland: 40 centers | Cryo                                 | 21 (NR)                               | 1×                                                   | Same                                                                           | 6              | Clearance after 3 mo, recurrence after 3 mo, side effects, time to complete clearance                        |                                                     |
|                             |                                                       | Placebo                              | 75 (74)                               | 2×/d for 12 wk                                       | Sodium nitrite was applied first, then citric acid, & the 2 creams were mixed. |                |                                                                                                              |                                                     |
|                             |                                                       | Sodium nitrite 3% + citric acid 4.5% | 74 (72)                               | 2×/d for 12 wk                                       | Same                                                                           |                |                                                                                                              |                                                     |
|                             |                                                       | Sodium nitrite 6% + citric acid 9%   | 77 (74)                               | 1×/d for 12 wk                                       | Same                                                                           |                |                                                                                                              |                                                     |
|                             |                                                       | Sodium nitrite 6% + citric acid 9%   | 73 (70)                               | 2×/d for 12 wk                                       | Same                                                                           |                |                                                                                                              |                                                     |
| Padhiar 2006 <sup>41</sup>  | India                                                 | Imiquimod 5%                         | 30 (30)                               | 3×/wk, maximum 16 wk                                 | Wash after 6-10 hr                                                             | 10             | Clearance after 4 mo, recurrence after 3 & 6 mo, side effects, partial clearance, time to complete clearance | ITT                                                 |
|                             |                                                       | Podophyllin 20%                      | 30 (30)                               | 1×/wk, maximum 6 wk                                  | Applied with a swab stick, wash after 4-6 hr                                   |                |                                                                                                              |                                                     |
| Petersen 1995 <sup>42</sup> | Denmark                                               | Podophyllotoxin 0.5% sol             | 18 (18)                               | 2×/d for 3 consecutive d, maximum 4 wk               | Fingertip application                                                          | 3              | Clearance after 6 wk, recurrence after 6 wk, side effects                                                    | ITT, only men, individual lesion analysis           |
|                             |                                                       | Podophyllotoxin 0.5% cream           | 18 (18)                               | Same                                                 | Same                                                                           |                |                                                                                                              |                                                     |
| Reichman 1988 <sup>43</sup> | USA                                                   | IFNα-n1 intra-lesional               | 17 (15)                               | 3×/wk, maximum 4 wk                                  | NR                                                                             | 12             | Clearance after 5, 10 & 15 wk, side effects; time to complete clearance                                      |                                                     |
|                             |                                                       | IFNβ (1 MIU) intra-lesional          | 20 (20)                               | Same                                                 | Same                                                                           |                |                                                                                                              |                                                     |

Appendix S2: Characteristics of RCTs included (continued)

| Reference                               | Country         | Intervention                                                                    | No. of Patients randomized (analyzed) | Frequency                      | Modalities                                          | Follow-Up (mo) | Outcomes                                                                     | Comments      |
|-----------------------------------------|-----------------|---------------------------------------------------------------------------------|---------------------------------------|--------------------------------|-----------------------------------------------------|----------------|------------------------------------------------------------------------------|---------------|
| Reichman 1988 <sup>43</sup> (continued) |                 | IFNα-2b intra-lesional                                                          | 23 (23)                               | Same                           | Same                                                |                | Clearance after 5, 10 & 15 wk, side effects; time to complete clearance      |               |
|                                         |                 | Placebo intra-lesional                                                          | 19 (18)                               | Same                           | Same                                                |                |                                                                              |               |
| Relakis 1996 <sup>44</sup>              | Brazil & Greece | CO <sub>2</sub> laser                                                           | 71 (71)                               | 1×                             | Applied Vaseline & ZnO <sub>2</sub> 10% cream       | 12             | Clearance after 3 mo, recurrence after 3, 6 & 9 mo, side effects             | ITT, only men |
|                                         |                 | 5-FU                                                                            | 218 (218)                             | 5×/wk, maximum 4 wk            | Applied Vaseline 5% ZnO <sub>2</sub> , before 5-FU  |                |                                                                              |               |
| Schofer 2006 <sup>45</sup>              | Germany         | CO <sub>2</sub> laser + 5-FU Ablative procedure (Electro, Cryo, laser, surgery) | 47 (47)<br>100 (100)                  | Both<br>1×/wk, maximum 4 wk    | Both<br>NR                                          | 6              | Clearance after 4 wk, recurrence after 3 & 6 mo, side effects                | ITT           |
|                                         |                 | Imiquimod 5%                                                                    | 155 (155)                             | 3×/d, maximum 16 wk            | Same                                                |                |                                                                              |               |
|                                         |                 | Ablative procedure + imiquimod                                                  | 103 (103)                             | Both                           | Same                                                |                |                                                                              |               |
| Sherrard 2007 <sup>46</sup>             | UK              | Podophyllin 25%                                                                 | 79 (56)                               | Times/wk NR, but maximum 8 wk  | NR                                                  | 2              | Clearance after 8 wk, side effects                                           |               |
|                                         |                 | TCA                                                                             | 88 (58)                               | Same                           | Same                                                |                |                                                                              |               |
|                                         |                 | Cryo                                                                            | 81 (66)                               | Same                           | Same                                                |                |                                                                              |               |
|                                         |                 | TCA + Podophyllin                                                               | 85 (65)                               | Same                           | Same                                                |                |                                                                              |               |
|                                         |                 | Cryo + Podophyllin                                                              | 76 (59)                               | Same                           | Same                                                |                |                                                                              |               |
| Simmons 1981 <sup>47</sup>              | UK              | Cryo                                                                            | 24 (16)                               | 1× every 2 wk, maximum 12 wk   | Produced 2-mm ice-balls larger than wart            | 3              | Clearance after 12 wk                                                        |               |
|                                         |                 | Electro                                                                         | 18 (11)                               | 1× every 2 wk, maximum 12 wk   | 2% lignocaine anesthesia                            |                |                                                                              |               |
| Snoeck 2001 <sup>48</sup>               | Belgium         | Cidofovir                                                                       | 19 (19)                               | 1×/d, 5 d/wk, 1 wk/2 for 12 wk | Applied with a cotton tipped swab or a rubber glove |                | Clearance after 3 mo, recurrence after 3 mo, side effects, partial clearance | ITT           |
|                                         |                 | Placebo                                                                         | 11 (11)                               | Same                           | Same                                                |                |                                                                              |               |

---

Appendix S2: Characteristics of RCTs included (continued)

---

| Reference                     | Country                             | Intervention                        | No. of Patients randomized (analyzed) | Frequency                                      | Modalities                                            | Follow-Up (mo) | Outcomes                                                                                                 | Comments                                    |
|-------------------------------|-------------------------------------|-------------------------------------|---------------------------------------|------------------------------------------------|-------------------------------------------------------|----------------|----------------------------------------------------------------------------------------------------------|---------------------------------------------|
| Stefanaki 2008 <sup>49</sup>  | Greece                              | Imiquimod                           | 60 (35)                               | 3×/wk, maximum 12 wk                           | NR                                                    | 12             | Clearance after 4, 8, 12 & 24 wk, recurrence after 9 mo, side effects                                    | 1 <sup>st</sup> treatment                   |
|                               |                                     | Cryo                                | 60 (45)                               | 1× every 3 wk, maximum 12 wk                   | Frozen 1× for 10-20 s                                 |                |                                                                                                          |                                             |
| Stockfelth 2008 <sup>50</sup> | Multicentric (Europe, South Africa) | Polyphenon 15%                      | 201 (161)                             | 3×/d, maximum 16 wk                            | NR                                                    | 7              | Clearance after 3 mo, recurrence after 3 mo, side effects, partial clearance, time to complete clearance | ITT modified                                |
|                               |                                     | Polyphenon 10%                      | 199 (170)                             | Same                                           | Same                                                  |                |                                                                                                          |                                             |
| Stone 1990 <sup>51</sup>      | USA                                 | Placebo                             | 103 (80)                              | Same                                           | Same                                                  | 5              | Clearance after 6 wk, recurrence after 3 mo, side effects                                                |                                             |
|                               |                                     | Podophyllin (dose NR)               | 144 (53)                              | Times/week NR, but maximum 6 wk                | NR                                                    |                |                                                                                                          |                                             |
| Strand 1995 <sup>52</sup>     | Sweden                              | Cryo                                | 154 (60)                              | 1×/wk, maximum 6 wk                            | Each AGW was frozen 1×                                | 4              | Clearance after 4 wk; recurrence after 3 mo, side effects                                                | ITT, only men                               |
|                               |                                     | Electro Podophyllotoxin 0.15% cream | 152 (51)<br>30 (30)                   | Same<br>2×/d for 3 consecutive d, maximum 4 wk | 1% lidocaine anesthesia<br>Applied with an applicator |                |                                                                                                          |                                             |
|                               |                                     | Podophyllotoxin 0.3% cream          | 31 (31)                               | Same                                           | Same                                                  |                |                                                                                                          |                                             |
| Swinehart 1997 <sup>53</sup>  | USA                                 | Podophyllotoxin 0.5% sol            | 29 (29)                               | Same                                           | NR                                                    | 5              | Clearance after 8 wk, recurrence after 3 mo, side effects, partial clearance, time to complete clearance | Individual lesion analysis                  |
|                               |                                     | 5-FU injection intra-lesional       | 80 (78)                               | 1×/wk, maximum 6× over 8 wk                    | NR                                                    |                |                                                                                                          |                                             |
|                               |                                     | 5-FU Placebo                        | 80 (76)<br>40 (33)                    | NR<br>Same                                     | Same<br>Same                                          |                |                                                                                                          |                                             |
| Syed 1998 <sup>54</sup>       | Pakistan                            | Imiquimod 2%                        | 30 (30)                               | 2×/d for 5 consecutive d, maximum 6 wk         | Wash & dry warts before each application and apply    | 4              | Clearance after 6 wk, recurrence after 2.5 mo, side effects                                              | ITT, only women, individual lesion analysis |
|                               |                                     | Placebo                             | 30 (30)                               | Same                                           | Same                                                  |                |                                                                                                          |                                             |

---

Appendix S2: Characteristics of RCTs included (continued)

| Reference                   | Country  | Intervention                | No. of Patients randomized (analyzed) | Frequency                                       | Modalities                                                                            | Follow-Up (mo) | Outcomes                                                                                   | Comments                                    |
|-----------------------------|----------|-----------------------------|---------------------------------------|-------------------------------------------------|---------------------------------------------------------------------------------------|----------------|--------------------------------------------------------------------------------------------|---------------------------------------------|
| Syed 1995 (a) <sup>55</sup> | Pakistan | IFN $\alpha$ cream          | 20 (20)                               | 3 $\times$ /d for 3 consecutive d, maximum 4 wk | Applied with a finger cot                                                             | 4              | Clearance after 4 wk, recurrence after 9 mo, side effects                                  | ITT, only men, individual lesion analysis   |
|                             |          | Podophyllotoxin 0.5% cream  | 20 (20)                               | Same                                            | Same                                                                                  |                |                                                                                            |                                             |
| Syed 1995 (b) <sup>56</sup> | Pakistan | Placebo                     | 20 (20)                               | Same                                            | Same                                                                                  | 4              | Clearance after 4 wk, side effects                                                         | ITT, only women, individual lesion analysis |
|                             |          | IFN $\alpha$ cream          | 20 (20)                               | 3 $\times$ /d for 3 consecutive d, maximum 4 wk | Applied with a finger cot                                                             |                |                                                                                            |                                             |
| Syed 1994 <sup>57</sup>     | Pakistan | Podophyllotoxin 0.5% cream  | 20 (20)                               | Same                                            | Same                                                                                  | 4              | Clearance after 4 wk, recurrence after 3 mo, side effects                                  | ITT, only women, individual lesion analysis |
|                             |          | Placebo                     | 20 (20)                               | Same                                            | Same                                                                                  |                |                                                                                            |                                             |
|                             |          | Podophyllotoxin 0.3% cream  | 30 (30)                               | 2 $\times$ /d for 3 consecutive d, maximum 4 wk | Let dry for at least 1 min without washing                                            |                |                                                                                            |                                             |
| Syed 2000 <sup>58</sup>     | Pakistan | Podophyllotoxin 0.5% cream  | 30 (30)                               | Same                                            | Same                                                                                  | 18             | Clearance after 16 wk, recurrence after 18 mo, side effects                                | ITT, only men, individual lesion analysis   |
|                             |          | Placebo                     | 20 (20)                               | Same                                            | Same                                                                                  |                |                                                                                            |                                             |
| Szeimies 2009 <sup>59</sup> | Germany  | Imiquimod 2%                | 30 (30)                               | 3 consecutive d, maximum 4 wk                   | Applied with a finger cot                                                             | 12             | Clearance after treatment, recurrence after 1, 2, 3, 6 & 12 mo, side effects, satisfaction | ITT                                         |
|                             |          | Placebo                     | 30 (30)                               | Same                                            | Same                                                                                  |                |                                                                                            |                                             |
| Tabari 2010 <sup>60</sup>   | Iran     | PDT + CO <sub>2</sub> laser | 84 (84)                               | 1 $\times$                                      | PDT: 100 J/cm <sup>2</sup> , 100 mW/cm <sup>2</sup> (640-740 nm) occlusion for 4-6 hr | 6              | Clearance after 4 or 8 wk, recurrence after 3 mo, side effects                             | ITT                                         |
|                             |          | CO <sub>2</sub> laser       | 91 (91)                               | Same                                            | Continuous wave, defocused beam (2-mm diameter), 10-20 W, general or local anesthesia |                |                                                                                            |                                             |
| Tabari 2010 <sup>60</sup>   | Iran     | Podophyllin 20%             | 60 (60)                               | 2 $\times$ /wk                                  | Wash after 20 min                                                                     | 6              | Clearance after 4 or 8 wk, recurrence after 3 mo, side effects                             | ITT                                         |
|                             |          | TCA 30%                     | 60 (60)                               | NR                                              | With a topical cotton soap and washed after 1 min                                     |                |                                                                                            |                                             |



Appendix S2: Characteristics of RCTs included (continued)

| Reference                     | Country                           | Intervention                     | No. of Patients randomized (analyzed) | Frequency                              | Modalities                          | Follow-Up (mo) | Outcomes                                                                      | Comments                  |
|-------------------------------|-----------------------------------|----------------------------------|---------------------------------------|----------------------------------------|-------------------------------------|----------------|-------------------------------------------------------------------------------|---------------------------|
| Tatti 2008 <sup>61</sup>      | USA, Europe, S Africa multicenter | Polyphenon 15%                   | 196 (159)                             | 3×/d, maximum 16 wk                    | NR                                  | 7              | Clearance after 16 wk, recurrence after 3 mo, side effects, partial clearance | ITT modified              |
|                               |                                   | Polyphenon 10%                   | 202 (162)                             | Same                                   | Same                                |                |                                                                               |                           |
| Tyring 1998 (a) <sup>62</sup> | USA                               | Placebo                          | 104 (83)                              | Same                                   | Same                                | 4              | Clearance after 16 wk, side effects, partial clearance                        |                           |
|                               |                                   | Imiquimod 5%                     | 18 (16)                               | 3×/wk, maximum 16 wk                   | Applied with cotton swab tip        |                |                                                                               |                           |
| Tyring 1998 (b) <sup>63</sup> | USA                               | Placebo                          | 4 (3)                                 | Same                                   | Same                                | 4              | Clearance after 4 & 8 wk, recurrence after 3 mo, side effects                 |                           |
|                               |                                   | Placebo                          | 107 (95)                              | 2×/d for 3 consecutive d, maximum 8 wk | NR                                  |                |                                                                               |                           |
| Vance 1986 <sup>64</sup>      | USA                               | Podophyllotoxin 0.5% gel         | 219 (197)                             | Same                                   | Same                                | 3              | Clearance after 4, 5, 7 & 12 wk, side effects, partial clearance              | ITT                       |
|                               |                                   | IFNα-2b (1 MIU) intra-lesional   | 37 (30)                               | 3×/wk, maximum 3 wk                    | NR                                  |                |                                                                               |                           |
|                               |                                   | IFNα-2b (0.1 MIU) intra-lesional | 38 (32)                               | Same                                   | Same                                |                |                                                                               |                           |
| von Krogh 1992 <sup>65</sup>  | Sweden                            | Placebo intra-lesional           | 39 (29)                               | Same                                   | Same                                | 3              | Clearance after 3 wk, recurrence after 2 mo, side effects                     |                           |
|                               |                                   | Placebo                          | 12 (11)                               | 2×/d, 3 d/wk for 2 wk                  | NR                                  |                |                                                                               |                           |
| von Krogh 1994 <sup>66</sup>  | Sweden                            | Podophyllotoxin 0.5% cream       | 48 (44)                               | Same                                   | Same                                | 6              | Clearance after 3 wk, recurrence after 2 & 6 mo, side effects                 | 1 <sup>st</sup> treatment |
|                               |                                   | Podophyllotoxin 0.25% sol        | 19 (18)                               | 2×/d, 3 d/wk for 2 wk                  | Applied with wool swabs             |                |                                                                               |                           |
|                               |                                   | Podophyllotoxin 0.5% sol         | 19 (16)                               | Same                                   | Same                                |                |                                                                               |                           |
| Wallin 1977 <sup>67</sup>     | Sweden                            | Placebo                          | 19 (17)                               | Same                                   | Same                                | 9              | Clearance after 4 wk, recurrence after 6 mo, side effects                     | Only men                  |
|                               |                                   | 5-FU                             | 21 (18)                               | 1×/d for 2 wk                          | Applied with cotton swab tip        |                |                                                                               |                           |
|                               |                                   | Podophyllin 25% sol              | 21 (19)                               | 1×/wk for 4 wk                         | Provider-applied, wash 4-6 hr later |                |                                                                               |                           |

Appendix S2: Characteristics of RCTs included (continued)

| Reference                   | Country | Intervention                   | No. of Patients randomized (analyzed) | Frequency                               | Modalities | Follow-Up (mo) | Outcomes                                                                          | Comments                                 |
|-----------------------------|---------|--------------------------------|---------------------------------------|-----------------------------------------|------------|----------------|-----------------------------------------------------------------------------------|------------------------------------------|
| Weismann 1982 <sup>68</sup> | Denmark | 5-FU                           | 30 (30)                               | 2×/wk for women, once/d for men         | NR         | 2              | Clearance after 8 wk, side effects, partial clearance, time to complete clearance | ITT                                      |
| Welander 1990 <sup>69</sup> | USA     | Placebo                        | 29 (29)                               | Same                                    | Same       | NR             | Clearance after 4 or 15 wk, side effects                                          |                                          |
|                             |         | IFNα-2b (1 MIU) intra-lesional | 20 (16)                               | 3×/wk, maximum 3 wk                     | NR         |                |                                                                                   |                                          |
| White 1997 <sup>70</sup>    | UK      | Placebo intra-lesional         | 22 (21)                               | Same                                    | Same       | 3              | Clearance after 5 wk, side effects                                                | ITT, only men, 1 <sup>st</sup> treatment |
|                             |         | Podophyllotoxin 0.5% sol       | 106 (77)                              | 2×/d for 3 consecutive d, maximum 12 wk | NR         |                |                                                                                   |                                          |
|                             |         | Podophyllin 0.5%               | 103 (86)                              | Same                                    | Same       |                |                                                                                   |                                          |
|                             |         | Podophyllin 2%                 | 106 (81)                              | Same                                    | Same       |                |                                                                                   |                                          |

Abbreviations: ITT, intention-to-treat; NR, not reported; KOH, potassium hydroxide; ALA, 5-aminolaevulinic acid; Mw, *Mycobacterium w*; Sol, solution; PDT, photodynamic therapy; Electro, electro-surgery; Cryo, cryotherapy; IFN, interferon.

### Appendix S3: Reason for exclusion

| 1st Author                              | Year | Exclusion Criteria                                         |
|-----------------------------------------|------|------------------------------------------------------------|
| Alfonso-Trujillo <sup>71</sup>          | 2008 | not RCT                                                    |
| Alfonso-Trujillo <sup>72</sup>          | 2008 | not RCT                                                    |
| Alfonso-Trujillo <sup>73</sup>          | 2009 | not RCT                                                    |
| Alfonso-Trujillo <sup>74</sup>          | 2009 | not RCT                                                    |
| Arany <sup>75</sup>                     | 1999 | duplicate of Tying <sup>62</sup>                           |
| Armstrong <sup>76</sup>                 | 1996 | another treatment not considered herein                    |
| Bar-Am <sup>77</sup>                    | 1993 | dose escalation                                            |
| Bashi <sup>78</sup>                     | 1985 | not RCT                                                    |
| Beutner <sup>79</sup>                   | 1998 | duplicate of Beutner <sup>8</sup>                          |
| Beutner <sup>80</sup>                   | 1995 | duplicate of Beutner <sup>8</sup>                          |
| Botacini <sup>81</sup>                  | 1993 | other localization                                         |
| Buck <sup>82</sup>                      | 2002 | not RCT                                                    |
| Chen <sup>83</sup>                      | 2009 | missing data (no English translation of Chinese)           |
| Chopra <sup>84</sup>                    | 1997 | duplicate of Tying <sup>62</sup>                           |
| Collaborative Study Group <sup>85</sup> | 1991 | another treatment not considered herein                    |
| Collaborative Study Group <sup>86</sup> | 1993 | another treatment not considered herein                    |
| Damstra <sup>87</sup>                   | 1991 | missing data                                               |
| Davidson-Parker <sup>88</sup>           | 1988 | another treatment not considered herein                    |
| Dinsmore <sup>89</sup>                  | 1997 | not RCT                                                    |
| Douglas <sup>90</sup>                   | 1990 | HIV                                                        |
| Edwards <sup>91</sup>                   | 1998 | duplicate of Edwards <sup>17</sup>                         |
| Edwards <sup>92</sup>                   | 1995 | duplicate of Edwards <sup>17</sup>                         |
| Eron <sup>93</sup>                      | 1993 | another treatment not considered herein                    |
| Ferenczy <sup>94</sup>                  | 1998 | duplicate of Edwards <sup>17</sup>                         |
| Ferenczy <sup>95</sup>                  | 1995 | HIV                                                        |
| Fife <sup>96</sup>                      | 2001 | dose escalation                                            |
| Fleshner <sup>97</sup>                  | 1994 | another treatment not considered herein                    |
| Fouere <sup>98</sup>                    | 2014 | missing data                                               |
| Garland <sup>99</sup>                   | 2006 | dose escalation                                            |
| Garland <sup>100</sup>                  | 2001 | not RCT                                                    |
| Goh <sup>101</sup>                      | 1998 | dose escalation                                            |
| Gollnick <sup>102</sup>                 | 2001 | dose escalation                                            |
| Gross <sup>103</sup>                    | 1996 | another treatment not considered herein                    |
| Gross <sup>104</sup>                    | 1998 | another treatment not considered herein                    |
| Handley <sup>105</sup>                  | 1991 | another treatment not considered herein                    |
| Handley <sup>106</sup>                  | 1992 | missing data (randomization unclear)                       |
| Hohenleutner <sup>107</sup>             | 1990 | another treatment not considered herein                    |
| Hoy <sup>108</sup>                      | 2012 | not RCT                                                    |
| IRCT2017011531949N1 <sup>109</sup>      | 2017 | missing data (recruiting)                                  |
| IRCT2015090514386N1 <sup>110</sup>      | 2015 | missing data (not recruiting)                              |
| IRCT2013111015364N1 <sup>111</sup>      | 2014 | missing data (not recruiting)                              |
| IRC 201202138992N1 <sup>112</sup>       | 2012 | not RCT                                                    |
| IRCT201412207848N1 <sup>113</sup>       | 2014 | not RCT                                                    |
| Jardine <sup>114</sup>                  | 2012 | another treatment not considered herein                    |
| Klutke <sup>115</sup>                   | 1995 | another treatment not considered herein                    |
| Lafuma <sup>116</sup>                   | 2003 | duplicate of Tying <sup>62</sup> and Edwards <sup>17</sup> |
| Landthaler <sup>117</sup>               | 1987 | HIV                                                        |
| Langley <sup>118</sup>                  | 2010 | not RCT                                                    |
| Lassus <sup>119</sup>                   | 1984 | duplicate of Lassus <sup>34</sup>                          |
| Li <sup>120</sup>                       | 2011 | dose escalation                                            |
| Liang <sup>121</sup>                    | 2009 | missing data (condyloma analysis)                          |

## Appendix S3: Continued

|                             |      |                                                   |
|-----------------------------|------|---------------------------------------------------|
| Liu <sup>122</sup>          | 2012 | missing data (condyloma analysis)                 |
| Maiti <sup>123</sup>        | 1985 | dose escalation                                   |
| Maw <sup>124</sup>          | 2002 | not RCT                                           |
| Mazurkiewicz <sup>125</sup> | 1990 | missing data (not accessible)                     |
| Meltzer <sup>126</sup>      | 2009 | not RCT and duplicate of Stockfleth <sup>49</sup> |
| Metaweia <sup>127</sup>     | 2005 | not RCT                                           |
| Mi <sup>128</sup>           | 2011 | missing data (condyloma analysis)                 |
| Mistrangelo <sup>129</sup>  | 2010 | another treatment not considered herein           |
| Monsonogo <sup>130</sup>    | 1996 | missing data (condyloma analysis)                 |
| NCT00674739 <sup>131</sup>  | 2011 | duplicate of Baker <sup>5</sup>                   |
| NCT00735462 <sup>132</sup>  | 2011 | duplicate of Baker <sup>5</sup>                   |
| NCT02520986 <sup>133</sup>  | 2016 | missing data (not recruiting)                     |
| NCT02724254 <sup>134</sup>  | 2016 | missing data (recruiting)                         |
| NCT01796821 <sup>135</sup>  | 2017 | missing data (recruiting)                         |
| NCT03153566 <sup>136</sup>  | 2017 | missing data (recruiting)                         |
| NCT01943630 <sup>137</sup>  | 2017 | missing data (recruiting)                         |
| NCT02849262 <sup>138</sup>  | 2016 | missing data (recruiting)                         |
| NCT02462187 <sup>139</sup>  | 2015 | missing data (not recruiting)                     |
| NCT02482428 <sup>140</sup>  | 2015 | missing data (not recruiting)                     |
| NCT02147353 <sup>141</sup>  | 2014 | missing data (not recruiting)                     |
| NCT02015260 <sup>142</sup>  | 2013 | missing data (not recruiting)                     |
| Nieminen <sup>143</sup>     | 1994 | another treatment not considered herein           |
| Owens <sup>144</sup>        | 1999 | duplicate of Edwards <sup>17</sup>                |
| Potocnik <sup>145</sup>     | 1997 | missing data (not accessible)                     |
| Rosen <sup>146</sup>        | 2015 | missing data (no placebo data)                    |
| Sauder <sup>147</sup>       | 2003 | duplicate from of Edwards <sup>17</sup>           |
| Sharma <sup>148</sup>       | 2017 | missing data (condyloma analysis)                 |
| Shi <sup>149</sup>          | 2013 | not RCT                                           |
| Stefanaki <sup>150</sup>    | 2014 | missing data                                      |
| Stellato <sup>151</sup>     | 1997 | another treatment not considered herein           |
| Swinehart <sup>152</sup>    | 1997 | duplicate from Swinehart <sup>53</sup>            |
| Syed <sup>153</sup>         | 2002 | missing data (not accessible)                     |
| Syed <sup>154</sup>         | 1994 | other localization                                |
| Syed <sup>155</sup>         | 1993 | dose escalation                                   |
| Trofatter <sup>156</sup>    | 2002 | dose escalation                                   |
| Tuncel <sup>157</sup>       | 2005 | missing data                                      |
| Urban <sup>158</sup>        | 2006 | missing data (not accessible)                     |
| Vesterinen <sup>159</sup>   | 1984 | other localization                                |
| Viazis <sup>160</sup>       | 2007 | HIV and other localization                        |
| von Krogh <sup>161</sup>    | 1981 | not RCT                                           |
| Xu <sup>162</sup>           | 2009 | missing data (no English translation of Chinese)  |
| Yaghoobi <sup>163</sup>     | 2014 | not RCT                                           |
| Yin <sup>164</sup>          | 1998 | another treatment not considered herein           |
| Yu <sup>165</sup>           | 2004 | another treatment not considered herein           |
| Zarcone <sup>166</sup>      | 1996 | not RCT                                           |
| Zervoudis <sup>167</sup>    | 2010 | another treatment not considered herein           |

Abbreviations: RCT: randomized-controlled trial; HIV: human immunodeficiency virus

**Appendix S4.** Risk of bias assessment (Bertolotti et al. *J Am Acad Dermatol* 2019.pii:S0190-9622(19)30525-0)

| Study | Abdullah 1993 | Akhavan 2014 | Arican 2004 | Azizjalali 2012 | Baker 2011 | Benedetti 1989 | Beutner 1989 | Beutner 1998 | Bilensoy 2011 | Bornstein 1997 | Camargo 2014 | Carpiniello 1988 | Chen 2007 | Claesson 1996 | Duus 1985 | Edwards 1998 | Edwards 1988 | Eron 1986 | Gabriel 1983 | Gilson 2009 | Godley 1987 | Greenberg 1991 | Gross 2007 | Hellberg 1995 | Isik 2014 | Jensen 1985 | Key 1988 | Khawaja 1989 | Kinghorn 1993 | Kirby 1990 | Komericki 2011 | Kumar 2014 | Lacey 2003 | Lassus 1987 | Loffabadi 2015 |  |  |  |  |
|-------|---------------|--------------|-------------|-----------------|------------|----------------|--------------|--------------|---------------|----------------|--------------|------------------|-----------|---------------|-----------|--------------|--------------|-----------|--------------|-------------|-------------|----------------|------------|---------------|-----------|-------------|----------|--------------|---------------|------------|----------------|------------|------------|-------------|----------------|--|--|--|--|
| (1)   |               |              |             |                 |            |                |              |              |               |                |              |                  |           |               |           |              |              |           |              |             |             |                |            |               |           |             |          |              |               |            |                |            |            |             |                |  |  |  |  |
| (2)   |               |              |             |                 |            |                |              |              |               |                |              |                  |           |               |           |              |              |           |              |             |             |                |            |               |           |             |          |              |               |            |                |            |            |             |                |  |  |  |  |
| (3)   |               |              |             |                 |            |                |              |              |               |                |              |                  |           |               |           |              |              |           |              |             |             |                |            |               |           |             |          |              |               |            |                |            |            |             |                |  |  |  |  |
| (4)   |               |              |             |                 |            |                |              |              |               |                |              |                  |           |               |           |              |              |           |              |             |             |                |            |               |           |             |          |              |               |            |                |            |            |             |                |  |  |  |  |
| (5)   |               |              |             |                 |            |                |              |              |               |                |              |                  |           |               |           |              |              |           |              |             |             |                |            |               |           |             |          |              |               |            |                |            |            |             |                |  |  |  |  |
| (6)   |               |              |             |                 |            |                |              |              |               |                |              |                  |           |               |           |              |              |           |              |             |             |                |            |               |           |             |          |              |               |            |                |            |            |             |                |  |  |  |  |
| (7)   |               |              |             |                 |            |                |              |              |               |                |              |                  |           |               |           |              |              |           |              |             |             |                |            |               |           |             |          |              |               |            |                |            |            |             |                |  |  |  |  |

| Study | Mahajan 2014 | Mazurkiewicz 1990 | Nath 1990 | Ormerod 2015 | On 2014 | Padhiar 2006 | Petersen 1995 | Reichman 1988 | Relakis 1996 | Schofer 2006 | Sherrard 2007 | Simmons 1981 | Snoeck 2001 | Stefanaki 2008 | Stockfleth 2008 | Stone 1990 | Strand 1995 | Swinehart 1997 | Syed 1995 a | Syed 1995 b | Syed 1998 | Syed 1994 | Syed 2000 | Szeimies 2009 | Tabari 2010 | Tatti 2008 | Tyring 1998 a | Tyring 1998 b | Vance 1986 | Von Krogh 1992 | Von Krogh 1994 | Wallin 1977 | Weismann 1982 | Welander 1990 | White 1997 |  |  |  |  |
|-------|--------------|-------------------|-----------|--------------|---------|--------------|---------------|---------------|--------------|--------------|---------------|--------------|-------------|----------------|-----------------|------------|-------------|----------------|-------------|-------------|-----------|-----------|-----------|---------------|-------------|------------|---------------|---------------|------------|----------------|----------------|-------------|---------------|---------------|------------|--|--|--|--|
| (1)   |              |                   |           |              |         |              |               |               |              |              |               |              |             |                |                 |            |             |                |             |             |           |           |           |               |             |            |               |               |            |                |                |             |               |               |            |  |  |  |  |
| (2)   |              |                   |           |              |         |              |               |               |              |              |               |              |             |                |                 |            |             |                |             |             |           |           |           |               |             |            |               |               |            |                |                |             |               |               |            |  |  |  |  |
| (3)   |              |                   |           |              |         |              |               |               |              |              |               |              |             |                |                 |            |             |                |             |             |           |           |           |               |             |            |               |               |            |                |                |             |               |               |            |  |  |  |  |
| (4)   |              |                   |           |              |         |              |               |               |              |              |               |              |             |                |                 |            |             |                |             |             |           |           |           |               |             |            |               |               |            |                |                |             |               |               |            |  |  |  |  |
| (5)   |              |                   |           |              |         |              |               |               |              |              |               |              |             |                |                 |            |             |                |             |             |           |           |           |               |             |            |               |               |            |                |                |             |               |               |            |  |  |  |  |
| (6)   |              |                   |           |              |         |              |               |               |              |              |               |              |             |                |                 |            |             |                |             |             |           |           |           |               |             |            |               |               |            |                |                |             |               |               |            |  |  |  |  |
| (7)   |              |                   |           |              |         |              |               |               |              |              |               |              |             |                |                 |            |             |                |             |             |           |           |           |               |             |            |               |               |            |                |                |             |               |               |            |  |  |  |  |

White square: low; grey square: uncertain; black square: high; (1) Random sequence generation (selection bias); (2) Allocation concealment (selection bias); (3) Blinding of participants and personnel (performance bias); (4) Blinding of outcome assessment (detection bias); (5) Incomplete outcome data (attrition bias); (6) Selective reporting (reporting bias); (7) Other bias.

**Appendix S5. Network meta-analysis estimates (lower triangle) and direct estimates (upper triangle) of complete lesion response for all therapies.**

|                 | Surgery               | Ablative+Imi          | Electro               | Cidofovir              | PDT                   | Podotox gel           | PDT+CO2 laser         | CO2 Laser+5-FU       | Podotox sol          | Mycobac IL           | CO2 laser            | Podotox cr           | Ablative             | ryo+Podotox cr       | Imi                  | TCA                  | KOH                  | 5-FU                 | Cryo                 | Polyph               |
|-----------------|-----------------------|-----------------------|-----------------------|------------------------|-----------------------|-----------------------|-----------------------|----------------------|----------------------|----------------------|----------------------|----------------------|----------------------|----------------------|----------------------|----------------------|----------------------|----------------------|----------------------|----------------------|
| Surgery         |                       |                       |                       |                        |                       |                       |                       |                      |                      |                      |                      |                      |                      |                      |                      |                      |                      |                      |                      |                      |
| Ablative+Imi    | 1.40<br>[0.56; 3.52]  |                       |                       |                        |                       |                       |                       |                      |                      |                      |                      |                      | 1.36<br>[0.78; 2.40] |                      | 1.55<br>[0.88; 2.73] |                      |                      |                      |                      |                      |
| Electro         | 1.48<br>[0.63; 3.47]  | 1.06<br>[0.48; 2.35]  |                       |                        |                       |                       |                       |                      |                      |                      |                      |                      |                      |                      |                      |                      |                      |                      | 1.21<br>[0.68; 2.14] |                      |
| Cidofovir       | 1.05<br>[0.06; 19.79] | 0.75<br>[0.04; 13.68] | 0.71<br>[0.04; 12.88] |                        |                       |                       |                       |                      |                      |                      |                      |                      |                      |                      |                      |                      |                      |                      |                      |                      |
| PDT             | 1.62<br>[0.59; 4.46]  | 1.15<br>[0.47; 2.83]  | 1.09<br>[0.45; 2.67]  | 1.54<br>[0.08; 29.12]  |                       |                       |                       |                      |                      |                      | 1.16<br>[0.64; 2.09] |                      |                      |                      |                      |                      |                      |                      |                      |                      |
| Podotox gel     | 1.56<br>[0.38; 6.38]  | 1.11<br>[0.29; 4.25]  | 1.05<br>[0.28; 3.99]  | 1.49<br>[0.07; 30.68]  | 0.96<br>[0.23; 3.98]  |                       |                       |                      |                      |                      |                      |                      |                      |                      |                      |                      |                      |                      |                      |                      |
| PDT+CO2 laser   | 1.68<br>[0.58; 4.87]  | 1.20<br>[0.46; 3.11]  | 1.13<br>[0.44; 2.93]  | 1.60<br>[0.08; 30.75]  | 1.04<br>[0.42; 2.54]  | 1.07<br>[0.25; 4.61]  |                       |                      |                      |                      | 1.12<br>[0.57; 2.19] |                      |                      |                      |                      |                      |                      |                      |                      |                      |
| CO2 Laser+5-FU  | 1.74<br>[0.71; 4.32]  | 1.24<br>[0.57; 2.74]  | 1.18<br>[0.54; 2.55]  | 1.66<br>[0.09; 30.23]  | 1.08<br>[0.51; 2.30]  | 1.12<br>[0.29; 4.26]  | 1.04<br>[0.46; 2.38]  |                      |                      |                      | 1.31<br>[0.80; 2.16] |                      |                      |                      |                      |                      |                      |                      | 1.14<br>[0.65; 2.00] |                      |
| Podotox sol     | 1.86<br>[0.90; 3.87]  | 1.33<br>[0.65; 2.73]  | 1.26<br>[0.67; 2.67]  | 1.77<br>[0.10; 31.38]  | 1.15<br>[0.50; 2.66]  | 1.19<br>[0.33; 4.27]  | 1.11<br>[0.45; 2.73]  | 1.07<br>[0.53; 2.16] |                      |                      |                      | 1.00<br>[0.47; 2.13] |                      |                      |                      |                      |                      |                      |                      |                      |
| Mycobac IL      | 1.83<br>[0.69; 4.88]  | 1.31<br>[0.57; 2.97]  | 1.23<br>[0.52; 2.95]  | 1.74<br>[0.09; 32.37]  | 1.13<br>[0.42; 3.06]  | 1.17<br>[0.29; 4.67]  | 1.09<br>[0.38; 3.11]  | 1.05<br>[0.43; 2.56] | 0.98<br>[0.44; 2.18] |                      |                      |                      |                      |                      | 1.21<br>[0.65; 2.25] |                      |                      |                      |                      |                      |
| CO2 laser       | 1.88<br>[0.82; 4.28]  | 1.34<br>[0.68; 2.63]  | 1.26<br>[0.64; 2.48]  | 1.78<br>[0.10; 31.81]  | 1.16<br>[0.64; 2.09]  | 1.20<br>[0.33; 4.36]  | 1.12<br>[0.57; 2.19]  | 1.08<br>[0.67; 1.73] | 1.01<br>[0.55; 1.83] | 1.02<br>[0.46; 2.28] |                      |                      | 0.94<br>[0.45; 1.96] |                      |                      |                      |                      | 0.75<br>[0.42; 1.35] | 2.40<br>[1.29; 4.46] |                      |
| Podotox cr      | 1.88<br>[0.83; 4.25]  | 1.34<br>[0.61; 2.95]  | 1.27<br>[0.61; 2.61]  | 1.79<br>[0.10; 31.88]  | 1.16<br>[0.47; 2.86]  | 1.21<br>[0.33; 4.37]  | 1.12<br>[0.43; 2.93]  | 1.08<br>[0.50; 2.34] | 1.01<br>[0.60; 1.68] | 1.03<br>[0.44; 2.42] | 1.00<br>[0.51; 1.98] |                      |                      |                      |                      |                      |                      |                      |                      |                      |
| Ablative        | 1.88<br>[0.78; 4.50]  | 1.34<br>[0.78; 2.31]  | 1.26<br>[0.60; 2.66]  | 1.79<br>[0.10; 32.16]  | 1.16<br>[0.52; 2.60]  | 1.20<br>[0.32; 4.47]  | 1.12<br>[0.47; 2.68]  | 1.08<br>[0.54; 2.16] | 1.01<br>[0.52; 1.95] | 1.03<br>[0.46; 2.26] | 1.00<br>[0.58; 1.74] | 1.00<br>[0.48; 2.08] |                      |                      | 1.14<br>[0.64; 2.02] |                      |                      |                      |                      |                      |
| Cryo+Podotox cr | 1.95<br>[0.74; 5.14]  | 1.39<br>[0.56; 3.42]  | 1.31<br>[0.57; 3.00]  | 1.85<br>[0.10; 34.86]  | 1.20<br>[0.45; 3.21]  | 1.25<br>[0.30; 5.10]  | 1.16<br>[0.41; 3.26]  | 1.12<br>[0.46; 2.68] | 1.04<br>[0.47; 2.30] | 1.06<br>[0.40; 2.80] | 1.04<br>[0.47; 2.27] | 1.03<br>[0.44; 2.44] | 1.04<br>[0.44; 2.43] |                      |                      |                      |                      |                      | 1.25<br>[0.66; 2.37] |                      |
| Imi             | 2.22<br>[1.04; 4.76]  | 1.58<br>[0.92; 2.73]  | 1.50<br>[0.81; 2.76]  | 2.11<br>[0.12; 36.76]  | 1.37<br>[0.63; 2.99]  | 1.42<br>[0.41; 4.89]  | 1.32<br>[0.57; 3.08]  | 1.27<br>[0.67; 2.42] | 1.19<br>[0.72; 1.97] | 1.21<br>[0.65; 2.25] | 1.18<br>[0.71; 1.97] | 1.18<br>[0.65; 2.14] | 1.18<br>[0.72; 1.94] | 1.14<br>[0.54; 2.41] |                      |                      |                      |                      | 0.95<br>[0.59; 1.53] |                      |
| TCA             | 2.28<br>[1.09; 4.75]  | 1.62<br>[0.81; 3.25]  | 1.53<br>[0.85; 2.78]  | 2.17<br>[0.12; 38.41]  | 1.41<br>[0.63; 3.14]  | 1.46<br>[0.41; 5.23]  | 1.36<br>[0.57; 3.24]  | 1.31<br>[0.67; 2.54] | 1.22<br>[0.76; 1.96] | 1.24<br>[0.57; 2.70] | 1.21<br>[0.70; 2.10] | 1.21<br>[0.67; 2.19] | 1.21<br>[0.65; 2.27] | 1.17<br>[0.56; 2.43] | 1.03<br>[0.64; 1.64] |                      |                      |                      |                      | 1.10<br>[0.71; 1.71] |
| KOH             | 2.48<br>[1.02; 6.01]  | 1.77<br>[0.79; 3.93]  | 1.67<br>[0.79; 3.51]  | 2.35<br>[0.13; 42.81]  | 1.53<br>[0.65; 3.59]  | 1.59<br>[0.42; 6.01]  | 1.48<br>[0.59; 3.68]  | 1.42<br>[0.71; 2.84] | 1.33<br>[0.67; 2.62] | 1.35<br>[0.56; 3.27] | 1.32<br>[0.71; 2.45] | 1.32<br>[0.62; 2.80] | 1.32<br>[0.63; 2.74] | 1.27<br>[0.55; 2.96] | 1.11<br>[0.59; 2.09] | 1.09<br>[0.58; 2.05] |                      |                      | 0.95<br>[0.49; 1.84] | 1.02<br>[0.50; 2.07] |
| 5-FU            | 2.44<br>[1.07; 5.56]  | 1.74<br>[0.85; 3.57]  | 1.64<br>[0.83; 3.26]  | 2.32<br>[0.13; 41.05]  | 1.50<br>[0.71; 3.17]  | 1.56<br>[0.44; 5.59]  | 1.45<br>[0.64; 3.28]  | 1.40<br>[0.84; 2.32] | 1.31<br>[0.72; 2.37] | 1.33<br>[0.59; 3.02] | 1.30<br>[0.82; 2.05] | 1.29<br>[0.66; 2.54] | 1.30<br>[0.69; 2.45] | 1.25<br>[0.56; 2.80] | 1.10<br>[0.64; 1.88] | 1.07<br>[0.61; 1.87] | 0.98<br>[0.58; 1.68] |                      |                      |                      |
| Cryo            | 2.43<br>[1.17; 5.03]  | 1.73<br>[0.92; 3.27]  | 1.64<br>[0.97; 2.76]  | 2.31<br>[0.13; 40.54]  | 1.50<br>[0.71; 3.15]  | 1.56<br>[0.44; 5.45]  | 1.45<br>[0.64; 3.26]  | 1.39<br>[0.77; 2.53] | 1.30<br>[0.82; 2.06] | 1.33<br>[0.64; 2.74] | 1.29<br>[0.82; 2.04] | 1.29<br>[0.73; 2.29] | 1.29<br>[0.74; 2.26] | 1.25<br>[0.66; 2.37] | 1.09<br>[0.75; 1.60] | 1.07<br>[0.75; 1.51] | 0.98<br>[0.57; 1.70] | 1.00<br>[0.61; 1.62] |                      |                      |
| Polyph          | 7.07<br>[2.82; 17.72] | 5.04<br>[2.24; 11.37] | 4.76<br>[2.13; 10.63] | 6.73<br>[0.40; 114.51] | 4.37<br>[1.72; 11.12] | 4.53<br>[1.39; 14.78] | 4.22<br>[1.57; 11.35] | 4.05<br>[1.81; 9.09] | 3.79<br>[1.89; 7.61] | 3.86<br>[1.61; 9.30] | 3.77<br>[1.82; 7.79] | 3.76<br>[1.82; 7.75] | 3.77<br>[1.75; 8.10] | 3.63<br>[1.45; 9.12] | 3.19<br>[1.71; 5.94] | 3.11<br>[1.54; 6.27] | 2.86<br>[1.28; 6.36] | 2.90<br>[1.44; 5.86] | 2.91<br>[1.51; 5.63] |                      |

**Appendix S6. Forest plot of the estimates of relative risk between each treatment and the reference placebo for complete lesion response. Sensitivity analyses: (A) Worst case scenario, (B) Best case scenario.**

**(A)**

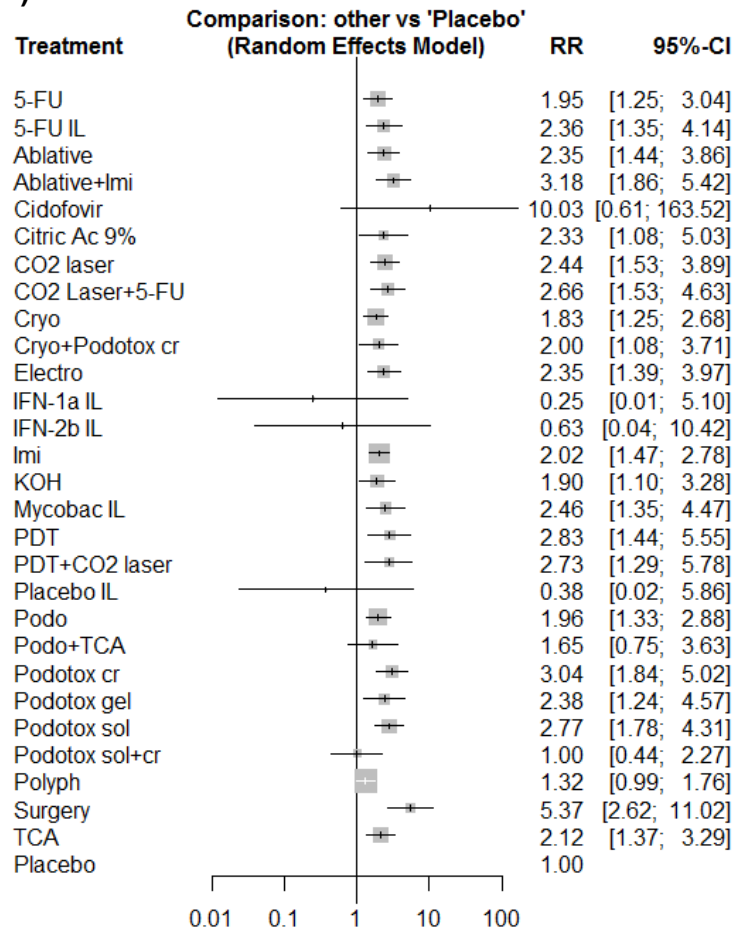

**(B)**

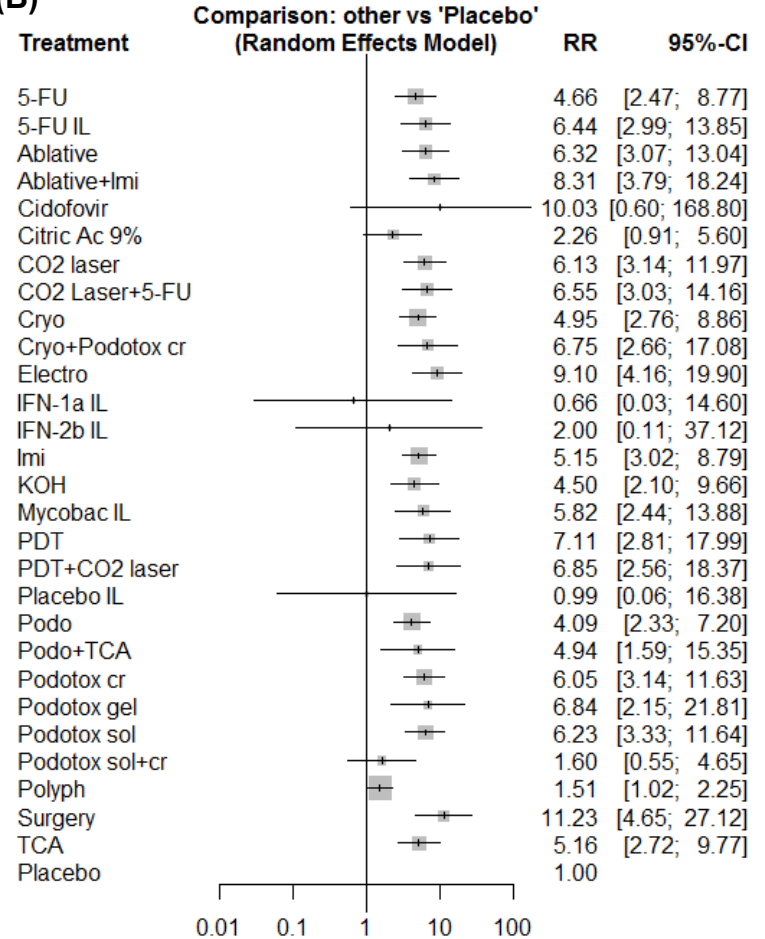

**Appendix S7. Network meta-analysis estimates (lower triangle) and direct estimates (upper triangle) of complete lesion response for all therapies. Sensitivity analyses, worst-case scenario**

|                | Surgery              | Cidofovir              | Ablative+Imi         | Podotox cr           | Podotox sol          | PDT                  | CO2 Laser+5-FIPDT+CO2 laser | CO2 laser            | Mycobac IL           | Electro              | Podotox gel          | Ablative             | TCA                  | Imi+Podotox cr       | Imi                  | 5-FU                 | KOH                  | Cryo                 | Polyph               |
|----------------|----------------------|------------------------|----------------------|----------------------|----------------------|----------------------|-----------------------------|----------------------|----------------------|----------------------|----------------------|----------------------|----------------------|----------------------|----------------------|----------------------|----------------------|----------------------|----------------------|
| Surgery        |                      |                        |                      |                      |                      |                      |                             |                      |                      |                      |                      |                      |                      |                      |                      |                      |                      |                      |                      |
| Cidofovir      | 0.54<br>[0.03; 9.57] |                        |                      |                      |                      |                      |                             |                      |                      |                      |                      |                      |                      |                      |                      |                      |                      |                      |                      |
| Ablative+Imi   | 1.69<br>[0.76; 3.77] | 3.15<br>[0.18; 54.11]  |                      |                      |                      |                      |                             |                      |                      |                      |                      | 1.36<br>[0.86; 2.16] |                      |                      | 1.55<br>[0.98; 2.45] |                      |                      |                      |                      |
| Podotox cr     | 1.77<br>[0.85; 3.69] | 3.30<br>[0.19; 56.24]  | 1.05<br>[0.55; 1.99] |                      | 1.00<br>[0.51; 1.97] |                      |                             |                      |                      |                      |                      |                      |                      |                      |                      |                      |                      |                      |                      |
| Podotox sol    | 1.94<br>[1.00; 3.76] | 3.62<br>[0.21; 61.05]  | 1.15<br>[0.64; 2.04] | 1.10<br>[0.71; 1.70] |                      |                      |                             |                      |                      |                      |                      |                      |                      |                      |                      |                      |                      |                      |                      |
| PDT            | 1.90<br>[0.78; 4.60] | 3.54<br>[0.20; 62.60]  | 1.12<br>[0.54; 2.33] | 1.07<br>[0.51; 2.27] | 0.98<br>[0.49; 1.95] |                      |                             | 1.16<br>[0.71; 1.89] |                      |                      |                      |                      |                      |                      |                      |                      |                      |                      |                      |
| CO2 Laser+5-F  | 2.02<br>[0.90; 4.50] | 3.76<br>[0.22; 64.81]  | 1.19<br>[0.63; 2.27] | 1.14<br>[0.60; 2.18] | 1.04<br>[0.58; 1.86] | 1.06<br>[0.56; 2.00] |                             | 1.34<br>[0.88; 2.05] |                      |                      |                      |                      |                      |                      |                      | 1.14<br>[0.72; 1.80] |                      |                      |                      |
| PDT+CO2 laser  | 1.97<br>[0.77; 5.06] | 3.67<br>[0.20; 66.14]  | 1.16<br>[0.52; 2.60] | 1.11<br>[0.49; 2.53] | 1.02<br>[0.47; 2.18] | 1.04<br>[0.48; 2.22] | 0.98<br>[0.48; 2.00]        |                      | 1.12<br>[0.62; 2.01] |                      |                      |                      |                      |                      |                      |                      |                      |                      |                      |
| CO2 laser      | 2.20<br>[1.05; 4.60] | 4.11<br>[0.24; 69.62]  | 1.30<br>[0.75; 2.25] | 1.25<br>[0.71; 2.20] | 1.14<br>[0.70; 1.85] | 1.16<br>[0.71; 1.89] | 1.09<br>[0.73; 1.64]        | 1.12<br>[0.62; 2.01] |                      |                      |                      | 1.00<br>[0.55; 1.83] |                      |                      |                      | 0.75<br>[0.46; 1.22] |                      | 2.40<br>[1.42; 4.06] |                      |
| Mycobac IL     | 2.19<br>[0.93; 5.11] | 4.08<br>[0.23; 70.90]  | 1.29<br>[0.66; 2.53] | 1.24<br>[0.61; 2.50] | 1.13<br>[0.59; 2.15] | 1.15<br>[0.51; 2.60] | 1.08<br>[0.52; 2.24]        | 1.11<br>[0.46; 2.67] | 0.99<br>[0.52; 1.91] |                      |                      |                      |                      |                      | 1.21<br>[0.73; 2.01] |                      |                      |                      |                      |
| Electro        | 2.28<br>[1.10; 4.74] | 4.26<br>[0.25; 72.98]  | 1.35<br>[0.72; 2.53] | 1.29<br>[0.73; 2.29] | 1.18<br>[0.73; 1.91] | 1.20<br>[0.58; 2.48] | 1.13<br>[0.61; 2.12]        | 1.16<br>[0.52; 2.57] | 1.04<br>[0.61; 1.78] | 1.04<br>[0.52; 2.08] |                      |                      |                      |                      |                      |                      |                      | 1.09<br>[0.70; 1.71] |                      |
| Podotox gel    | 2.25<br>[0.85; 5.96] | 4.21<br>[0.24; 74.02]  | 1.33<br>[0.57; 3.10] | 1.28<br>[0.56; 2.91] | 1.16<br>[0.53; 2.56] | 1.19<br>[0.47; 3.03] | 1.12<br>[0.48; 2.63]        | 1.15<br>[0.42; 3.10] | 1.02<br>[0.46; 2.28] | 1.03<br>[0.43; 2.50] | 0.99<br>[0.43; 2.28] |                      |                      |                      |                      |                      |                      |                      |                      |
| Ablative       | 2.28<br>[1.05; 4.93] | 4.26<br>[0.25; 72.51]  | 1.35<br>[0.87; 2.10] | 1.29<br>[0.70; 2.37] | 1.18<br>[0.69; 2.01] | 1.20<br>[0.62; 2.33] | 1.13<br>[0.64; 2.01]        | 1.16<br>[0.55; 2.43] | 1.04<br>[0.66; 1.63] | 1.04<br>[0.55; 1.99] | 1.00<br>[0.56; 1.80] | 1.01<br>[0.45; 2.29] |                      |                      |                      | 1.14<br>[0.71; 1.83] |                      |                      |                      |
| TCA            | 2.53<br>[1.30; 4.94] | 4.73<br>[0.28; 79.81]  | 1.50<br>[0.86; 2.62] | 1.43<br>[0.88; 2.35] | 1.31<br>[0.89; 1.92] | 1.33<br>[0.69; 2.60] | 1.26<br>[0.72; 2.19]        | 1.29<br>[0.61; 2.71] | 1.15<br>[0.73; 1.81] | 1.16<br>[0.62; 2.17] | 1.11<br>[0.70; 1.75] | 1.12<br>[0.51; 2.47] | 1.11<br>[0.67; 1.85] |                      |                      |                      |                      | 1.08<br>[0.76; 1.56] |                      |
| Imi+Podotox cr | 2.68<br>[1.18; 6.07] | 5.01<br>[0.29; 87.35]  | 1.59<br>[0.79; 3.20] | 1.52<br>[0.77; 2.98] | 1.38<br>[0.76; 2.53] | 1.41<br>[0.65; 3.09] | 1.33<br>[0.66; 2.67]        | 1.36<br>[0.58; 3.19] | 1.22<br>[0.66; 2.25] | 1.23<br>[0.57; 2.62] | 1.17<br>[0.63; 2.21] | 1.19<br>[0.48; 2.92] | 1.18<br>[0.61; 2.28] | 1.06<br>[0.60; 1.86] |                      |                      |                      | 1.09<br>[0.67; 1.78] |                      |
| Imi            | 2.65<br>[1.34; 5.25] | 4.95<br>[0.30; 82.24]  | 1.57<br>[1.01; 2.44] | 1.50<br>[0.92; 2.44] | 1.37<br>[0.92; 2.04] | 1.40<br>[0.74; 2.64] | 1.32<br>[0.78; 2.22]        | 1.35<br>[0.66; 2.76] | 1.21<br>[0.80; 1.82] | 1.21<br>[0.73; 2.01] | 1.16<br>[0.73; 1.86] | 1.18<br>[0.57; 2.43] | 1.16<br>[0.78; 1.74] | 1.05<br>[0.72; 1.52] | 0.99<br>[0.56; 1.74] |                      |                      | 1.04<br>[0.73; 1.49] |                      |
| 5-FU           | 2.75<br>[1.32; 5.76] | 5.14<br>[0.30; 86.80]  | 1.63<br>[0.91; 2.90] | 1.56<br>[0.89; 2.74] | 1.42<br>[0.87; 2.31] | 1.45<br>[0.78; 2.69] | 1.37<br>[0.90; 2.07]        | 1.40<br>[0.70; 2.81] | 1.25<br>[0.86; 1.82] | 1.26<br>[0.65; 2.44] | 1.21<br>[0.70; 2.08] | 1.22<br>[0.55; 2.69] | 1.21<br>[0.72; 2.02] | 1.09<br>[0.68; 1.73] | 1.03<br>[0.55; 1.92] | 1.04<br>[0.68; 1.58] |                      | 1.05<br>[0.59; 1.87] |                      |
| KOH            | 2.83<br>[1.29; 6.20] | 5.28<br>[0.31; 90.85]  | 1.67<br>[0.87; 3.21] | 1.60<br>[0.85; 3.01] | 1.46<br>[0.84; 2.55] | 1.49<br>[0.73; 3.04] | 1.40<br>[0.79; 2.51]        | 1.44<br>[0.66; 3.15] | 1.29<br>[0.77; 2.16] | 1.29<br>[0.63; 2.65] | 1.24<br>[0.68; 2.25] | 1.26<br>[0.54; 2.94] | 1.24<br>[0.68; 2.26] | 1.12<br>[0.66; 1.89] | 1.06<br>[0.54; 2.05] | 1.07<br>[0.64; 1.77] | 1.03<br>[0.65; 1.62] | 1.06<br>[0.60; 1.90] |                      |
| Cryo           | 2.94<br>[1.52; 5.67] | 5.48<br>[0.33; 91.73]  | 1.74<br>[1.05; 2.89] | 1.66<br>[1.04; 2.66] | 1.52<br>[1.06; 2.18] | 1.55<br>[0.84; 2.86] | 1.46<br>[0.88; 2.40]        | 1.49<br>[0.74; 3.00] | 1.33<br>[0.92; 1.94] | 1.34<br>[0.75; 2.41] | 1.29<br>[0.86; 1.92] | 1.30<br>[0.61; 2.77] | 1.29<br>[0.82; 2.02] | 1.16<br>[0.87; 1.54] | 1.09<br>[0.67; 1.78] | 1.11<br>[0.83; 1.48] | 1.07<br>[0.72; 1.59] | 1.04<br>[0.66; 1.63] |                      |
| Polyph         | 4.07<br>[1.88; 8.83] | 7.60<br>[0.46; 125.86] | 2.41<br>[1.32; 4.42] | 2.31<br>[1.30; 4.11] | 2.10<br>[1.24; 3.56] | 2.15<br>[1.03; 4.46] | 2.02<br>[1.08; 3.77]        | 2.07<br>[0.93; 4.62] | 1.85<br>[1.07; 3.20] | 1.86<br>[0.96; 3.62] | 1.78<br>[0.98; 3.24] | 1.81<br>[0.89; 3.68] | 1.79<br>[1.01; 3.16] | 1.61<br>[0.95; 2.72] | 1.52<br>[0.77; 3.00] | 1.54<br>[1.00; 2.36] | 1.48<br>[0.87; 2.51] | 1.44<br>[0.78; 2.67] | 1.39<br>[0.86; 2.24] |



**Appendix S8. Probabilities of treatment ranking. Sensitivity analyses: (A) Worst case scenario, (B) Best case scenario.**

**(A)**

|                 | SUCRA |
|-----------------|-------|
| Surgery         | 0.949 |
| Cidofovir       | 0.856 |
| Ablative+Imi    | 0.802 |
| Podotox cr      | 0.777 |
| Podotox sol     | 0.727 |
| PDT             | 0.712 |
| CO2 Laser+5-FU  | 0.685 |
| PDT+CO2 laser   | 0.677 |
| CO2 laser       | 0.617 |
| Mycobac IL      | 0.612 |
| Electro         | 0.585 |
| 5-FU IL         | 0.583 |
| Podotox gel     | 0.582 |
| Ablative        | 0.581 |
| Citric Ac 9%    | 0.566 |
| TCA             | 0.492 |
| Cryo+Podotox cr | 0.450 |
| Imi             | 0.440 |
| 5-FU            | 0.408 |
| Podo            | 0.407 |
| KOH             | 0.399 |
| Cryo            | 0.339 |
| Podo+TCA        | 0.338 |
| IFN-2b IL       | 0.250 |
| Polyph          | 0.190 |
| Podotox sol+cr  | 0.150 |
| Placebo IL      | 0.131 |
| Placebo         | 0.105 |
| IFN-1a IL       | 0.091 |

**(B)**

|                 | SUCRA |
|-----------------|-------|
| Surgery         | 0.890 |
| Electro         | 0.829 |
| Ablative+Imi    | 0.787 |
| PDT             | 0.693 |
| Cidofovir       | 0.689 |
| PDT+CO2 laser   | 0.668 |
| Cryo+Podotox cr | 0.663 |
| CO2 Laser+5-FU  | 0.658 |
| Podotox gel     | 0.647 |
| 5-FU IL         | 0.643 |
| Ablative        | 0.633 |
| Podotox sol     | 0.631 |
| CO2 laser       | 0.616 |
| Podotox cr      | 0.606 |
| Mycobac IL      | 0.578 |
| TCA             | 0.495 |
| Podo+TCA        | 0.495 |
| Imi             | 0.489 |
| Cryo            | 0.457 |
| 5-FU            | 0.421 |
| KOH             | 0.415 |
| IFN-2b IL       | 0.330 |
| Podo            | 0.329 |
| Citric Ac 9%    | 0.211 |
| Placebo IL      | 0.167 |
| Podotox sol+cr  | 0.148 |
| Polyph          | 0.127 |
| IFN-1a IL       | 0.122 |
| Placebo         | 0.062 |

## REFERENCES:

1. Abdullah AN, Walzman M, Wade A. Treatment of external genital warts comparing cryotherapy (liquid nitrogen) and trichloroacetic acid. *Sex Transm Dis* 1993; **20**:344-5
2. Akhavan S, Mohammadi SR, Modarres Gillani M, et al. Efficacy of combination therapy of oral zinc sulfate with imiquimod, podophyllin or cryotherapy in the treatment of vulvar warts. *J Obstet Gynaecol Res* 2014; **40**:2110-3
3. Arican O, Guneri F, Bilgic K, et al. Topical imiquimod 5% cream in external anogenital warts: a randomized, double-blind, placebo-controlled study. *J Dermatol* 2004; **31**:627-31
4. Azizjalali M, Ghaffarpour G, Mousavifard B. CO<sub>2</sub> laser therapy versus cryotherapy in treatment of genital warts; a randomized controlled trial (RCT). *Iran J Microbiol* 2012; **4**:187-90
5. Baker DA, Ferris DG, Martens MG, et al. Imiquimod 3.75% cream applied daily to treat anogenital warts: combined results from women in two randomized, placebo-controlled studies. *Infect Dis Obstet Gynecol* 2011:806105
6. Benedetti Panici P, Scambia G, Baiocchi G, et al. Randomized clinical trial comparing systemic interferon with diathermocoagulation in primary multiple and widespread anogenital condyloma. *Obstet Gynecol* 1989; **74**:393-7
7. Beutner KR, Conant MA, Friedman-Kien AE, et al. Patient-applied podofilox for treatment of genital warts. *Lancet* 1989; **1**:831-4
8. Beutner KR, Tyring SK, Trofatter KF, et al. Imiquimod, a patient-applied immune-response modifier for treatment of external genital warts. *Antimicrob Agents Chemother* 1998; **42**:789-94
9. Bilensoy EA , Moroy PB, Çirpanli YA, et al. A double-blind placebo-controlled study of 5-fluorouracil: cyclodextrin complex loaded thermosensitive gel for the treatment of HPV induced condyloma. *J Incl Phenom Macrocycl Chem* 2011; **69**:309–13
10. Bornstein J, Pascal B, Zarfati D, et al. Recombinant human interferon-beta for condylomata acuminata: a randomized, double-blind, placebo-controlled study of intralesional therapy. *Int J STD AIDS* 1997; **8**:614-21
11. Camargo CLdA, Belda WJr, Fagundes LJ, et al. A prospective, open, comparative study of 5% potassium hydroxide solution versus cryotherapy in the treatment of genital warts in

- men. *An Bras Dermatol* 2014; **89**:236-41
12. Carpiniello VL, Malloy TR, Sedlacek TV, et al. Results of carbon dioxide laser therapy and topical 5-fluorouracil treatment for subclinical condyloma found by magnified penile surface scanning. *J Urol* 1988; **140**:53-4
  13. Chen K, Chang BZ, Ju M, et al. Comparative study of photodynamic therapy vs CO<sub>2</sub> laser vaporization in treatment of condylomata acuminata: a randomized clinical trial. *Br J Dermatol* 2007; **156**:516-20
  14. Claesson U, Lassus A, Happonen H, et al. Topical treatment of venereal warts: a comparative open study of podophyllotoxin cream versus solution. *Int J STD AIDS* 1996; **7**:429-34
  15. Duus BR, Philipsen T, Christensen JD, et al. Refractory condylomata acuminata: a controlled clinical trial of carbon dioxide laser versus conventional surgical treatment. *Genitourin Med* 1985; **61**:59-61
  16. Edwards A, Atma-Ram A, Thin RN. Podophyllotoxin 0.5% v podophyllin 20% to treat penile warts. *Genitourin Med* 1988; **64**:263-5
  17. Edwards L, Ferenczy A, Eron L, et al. Self-administered topical 5% imiquimod cream for external anogenital warts. HPV Study Group. Human PapillomaVirus. *Arch Dermatol* 1998; **134**:25-30
  18. Eron LJ, Alder MB, O'Rourke JM, et al. Recurrence of condylomata acuminata following cryotherapy is not prevented by systemically administered interferon. *Genitourin Med* 1993; **69**:91-3
  19. Gabriel G, Thin RN. Treatment of anogenital warts. Comparison of trichloroacetic acid and podophyllin versus podophyllin alone. *Br J Vener Dis* 1983; **59**:124-6
  20. Gilson RJC, Ross J, Maw R, et al. A multicentre, randomised, double-blind, placebo controlled study of cryotherapy versus cryotherapy and podophyllotoxin cream as treatment for external anogenital warts. *Sex Transm Infect* 2009; **85**:514-9
  21. Godley MJ, Bradbeer CS, Gellan M, et al. Cryotherapy compared with trichloroacetic acid in treating genital warts. *Genitourin Med* 1987; **63**:390-2
  22. Greenberg MD, Rutledge LH, Reid R, et al. A double-blind, randomized trial of 0.5% podofilox and placebo for the treatment of genital warts in women. *Obstet Gynecol* 1991;

77:735-9

23. Gross G, Meyer KG, Pres H, et al. A randomized, double-blind, four-arm parallel-group, placebo-controlled phase II/III study to investigate the clinical efficacy of two galenic formulations of polyphenon E in the treatment of external genital warts. *J Eur Acad Dermatol Venereol* 2007; **21**:1404-2
24. Hellberg D, Svarrer T, Nilsson S, et al. Self-treatment of female external genital warts with 0.5% podophyllotoxin cream (Condyline) vs weekly applications of 20% podophyllin solution. *Int J STD AIDS* 1995; **6**:257-61
25. Işık S, Koca R, Sarici G, et al. A comparison of a 5% potassium hydroxide solution with a 5-fluorouracil and salicylic acid combination in the treatment of patients with anogenital warts: a randomized, open-label clinical trial. *Int J Dermatol* 2014; **53**:1145-50
26. Jensen SL. Comparison of podophyllin application with simple surgical excision in clearance and recurrence of perianal condylomata acuminata. *Lancet* 1985; **2**:1146-8
27. Keay S, Teng N, Eisenberg M, et al. Topical interferon for treating condyloma acuminata in women. *J Infect Dis* 1988; **158**:934-9
28. Khawaja HT. Podophyllin versus scissor excision in the treatment of perianal condylomata acuminata: a prospective study. *Br J Surg* 1989; **76**:1067-8
29. Kinghorn GR, McMillan A, Mulcahy F, et al. An open, comparative, study of the efficacy of 0.5% podophyllotoxin lotion and 25% podophyllotoxin solution in the treatment of condylomata acuminata in males and females. *Int J STD AIDS* 1993; **4**:194-9
30. Kirby P, Dunne A, King DH, et al. Double-blind randomized clinical trial of self-administered podofilox solution versus vehicle in the treatment of genital warts. *Am J Med* 1990; **88**:465-9
31. Komericki P, Akkilic-Materna M, Strimitzer T, et al. Efficacy and safety of imiquimod versus podophyllotoxin in the treatment of anogenital warts. *Sex Transm Dis* 2011; **38**:216-8
32. Kumar P, Dar L, Saldiwal S, et al. Intralesional injection of *Mycobacterium w* vaccine vs imiquimod, 5%, cream in patients with anogenital warts: a randomized clinical trial. *JAMA Dermatol* 2014; **150**:1072-8
33. Lacey CJN, Goodall RL, Tennvall GR, et al. Randomised controlled trial and economic

- evaluation of podophyllotoxin solution, podophyllotoxin cream, and podophyllin in the treatment of genital warts. *Sex Transm Infect* 2003; **79**:270-5
34. Lassus A. Comparison of podophyllotoxin and podophyllin in treatment of genital warts. *Lancet Lond Engl* 1987; **2**:512-3
  35. Lotfabadi P, Maleki F, Gholami A, et al. Liquid nitrogen cryotherapy versus 70% trichloroacetic acid in the treatment of anogenital warts: a randomized controlled trial. *Iran J Dermatol* 2015; **18**:151-5
  36. Mahajan BBa, Tilak Raj Rb, Kumar R. A comparative evaluation of therapeutic efficacy and safety of the cryotherapy (liquid nitrogen) with topical 20% podophyllin v/s intralesional bleomycin with topical 5% placentrex gel in the treatment of condyloma acuminata. *Asian J Pharm Clin Res* 2014; **7**:36-42
  37. Mazurkiewicz W, Jabłońska S. Clinical efficacy of condyline (0.5% podophyllotoxin) solution and cream versus podophyllin in the treatment of external condylomata acuminata. *J Dermatol Treat* 1990; **1**:123-5
  38. Nath D, Kumar B, Sharma V.K, et al. Comparison of podophyllin and trichloroacetic acid for the treatment of genital warts. *Indian J Dermatol Venereol Leprol* 1990; **56**:22-4
  39. On SCJa, Linkner RVa, Haddican Ma, et al. A single-blinded randomized controlled study to assess the efficacy of twice daily application of sinecatechins 15% ointment when used sequentially with cryotherapy in the treatment of external genital warts. *J Drugs Dermatol* 2014; **13**:1400-5
  40. Ormerod AD, van Voorst Vader PC, Majewski S, et al. Evaluation of the efficacy, safety, and tolerability of 3 dose regimens of topical sodium nitrite with citric acid in patients with anogenital warts: a randomized clinical trial. *JAMA Dermatol* 2015; **151**:854-61
  41. Padhiar BB, Karia UK, Aggarwal R, et al. A comparative study of efficacy of imiquimod 5% versus podophyllin 20% in treatment of external and genital warts (60 patients). *Indian Journal Of Sexually Transmitted Diseases. Indian J Sex Transm Dis* 2006; **27**:671-9
  42. Petersen CS, Agner T, Ottevanger V, et al. A single-blind study of podophyllotoxin cream 0.5% and podophyllotoxin solution 0.5% in male patients with genital warts. *Genitourin Med* 1995; **71**:391-2
  43. Reichman RC, Oakes D, Bonnez W, et al. Treatment of condyloma acuminatum with three

different interferons administered intralesionally. A double-blind, placebo-controlled trial. *Ann Intern Med* 1988; **108**:675-79

44. Relakis K, Cardamakis E, Korantzis A, et al. Treatment of men with flat (FC) or acuminata (CA) condylomata with interferon alpha-2a. *Eur J Gynaecol Oncol* 1996; **17**:529-33
45. Schöfer HA, V/van Ophoven AB, Henke UA, et al. Randomized, comparative trial on the sustained efficacy of topical imiquimod 5% cream versus conventional ablative methods in external anogenital warts. *Eur J Dermatol* 2006; **16**:642-8
46. Sherrard J, Riddell L. Comparison of the effectiveness of commonly used clinic-based treatments for external genital warts. *Int J STD AIDS* 2007; **18**:365-8
47. Simmons PD, Langlet F, Thin RN. Cryotherapy versus electrocautery in the treatment of genital warts. *Br J Vener Dis* 1981; **57**:273-4
48. Snoeck R, Bossens M, Parent D, et al. Phase II double-blind, placebo-controlled study of the safety and efficacy of cidofovir topical gel for the treatment of patients with human papillomavirus infection. *Clin Infect Dis* 2001; **33**:597-602
49. Stockfleth E, Beti H, Orasan R, et al. Topical polyphenon® E in the treatment of external genital and perianal warts: a randomized controlled trial. *Br J Dermatol* 2008; **158**:1329-38
50. Stefanaki C, Katzouranis I, Lagogianni E, et al. Comparison of cryotherapy to imiquimod 5% in the treatment of anogenital warts. *Int J STD AIDS* 2008; **19**:441-4
51. Stone KM, Becker TM, Hadgu A, et al. Treatment of external genital warts: a randomised clinical trial comparing podophyllin, cryotherapy, and electrodesiccation. *Genitourin Med* 1990; **66**:16-9
52. Strand A, Brinkeborn RM, Siboulet A. Topical treatment of genital warts in men, an open study of podophyllotoxin cream compared with solution. *Genitourin Med* 1995; **71**:387-90
53. Swinehart JM, Sperling M, Philips S, et al. Intralesional fluorouracil/epinephrine injectable Gel for treatment of condylomata acuminata. *Arch Dermatol* 1997; **133**:67-73
54. Syed TA, Ahmadpour OA, Ahmad SA, et al. Management of female genital warts with an analog of imiquimod 2% in cream: a randomized, double-blind, placebo-controlled study. *J Dermatol* 1998; **25**:429-33
55. Syed TA, Cheema KM, Khayyami M, et al. Human leukocyte interferon-alpha versus podophyllotoxin in cream for the treatment of genital warts in males. A placebo-controlled,

- double-blind, comparative study. *Dermatol Basel Switz* 1995; **191**:129-32
56. Syed TA, Khayyami M, Kriz D, et al. Management of genital warts in women with human leukocyte interferon-alpha vs. podophyllotoxin in cream: a placebo-controlled, double-blind, comparative study. *J Mol Med Berl Ger* 1995; **73**:255-8
  57. Syed TA, Lundin S, Ahmad SA. Topical 0.3% and 0.5% podophyllotoxin cream for self-treatment of condylomata acuminata in women. A placebo-controlled, double-blind study. *Dermatol Basel Switz* 1994; **189**:142-5
  58. Syed TA, Hadi SM, Qureshi ZA, et al. Treatment of external genital warts in men with imiquimod 2% in cream. A placebo-controlled, double-blind study. *J Infect* 2000; **41**:148-51
  59. Szeimies RM, Schleyer V, Moll I, et al. Adjuvant photodynamic therapy does not prevent recurrence of condylomata acuminata after carbon dioxide laser ablation-a phase III, prospective, randomized, bicentric, double-blind study. *Dermatol Surg* 2009; **35**:757-64
  60. Tabari S, Javadian M, Barat S. The efficacy of podophyllin 20% and trichloroacetic acid %30 in the treatment of genital wart. *Casp J Intern Med* 2010; **1**:16-9
  61. Tatti S, Swinehart JM, Thielert C, et al. Sinecatechins, a defined green tea extract, in the treatment of external anogenital warts: a randomized controlled trial. *Obstet Gynecol* 2008; **111**:1371-9
  62. Tyring SK, Arany I, Stanley MA, et al. A randomized, controlled, molecular study of condylomata acuminata clearance during treatment with imiquimod. *J Infect Dis* 1998; **178**:551-5
  63. Tyring S, Edwards L, Cherry LK, et al. Safety and efficacy of 0.5% podofilox gel in the treatment of anogenital warts. *Arch Dermatol* 1998; **134**:33-8
  64. Vance JC, Bart BJ, Hansen RC, et al. Intralesional recombinant alpha-2 interferon for the treatment of patients with condyloma acuminatum or verruca plantaris. *Arch Dermatol* 1986; **122**:272-7
  65. von Krogh G, Hellberg D. Self-treatment using a 0.5% podophyllotoxin cream of external genital condylomata acuminata in women. A placebo-controlled, double-blind study. *Sex Transm Dis* 1992; **19**:170-4
  66. von Krogh G, Szpak E, Andersson M, et al. Self-treatment using 0.25%-0.50%

- podophyllotoxin-ethanol solutions against penile condylomata acuminata: a placebo-controlled comparative study. *Genitourin Med* 1994; **70**:105-9
67. Wallin J. 5-Fluorouracil in the treatment of penile and urethral condylomata acuminata. *Br J Vener Dis* 1977; **53**:240-3
68. Weismann K, Kassis V. Treatment of condyloma acuminatum with 0.5% 5-fluorouracil-solution, a double-blind clinical trial. *Z Für Hautkrankh* 1982; **57**:810-6
69. Welandar CE, Homesley HD, Smiles KA, et al. Intralesional interferon alfa-2b for the treatment of genital warts. *Am J Obstet Gynecol* 1990; **162**:348-54
70. White DJ, Billingham C, Chapman S, et al. Podophyllin 0.5% or 2.0% v podophyllotoxin 0.5% for the self treatment of penile warts: a double blind randomised study. *Genitourin Med* 1997; **73**:184-7
71. Alfonso-Trujillo I, Labrada MA, Rojas ARG, et al. Condyloma acuminata: comparative therapeutic efficacy between podophyllin vs. Cryotherapy. *Dermatol Perú* 2008; **18**:27-34
72. Alfonso-Trujillo I, Labrada MA, Rojas ARG, et al. Radiosurgery and the cryosurgery in the treatment of the anal condyloma acuminata. *Dermatol Perú* 2008; **18**:98-105
73. Alfonso-Trujillo I, Labrada MA, Rojas ARG, et al. Condyloma acuminata: Comparison of the therapeutic efficacy of topical 5-fluorouracil and cryosurgery. *Semergen* 2009; **35**:484-8
74. Alfonso-Trujillo I, Acosta D, Alvarez M, et al. Condyloma acuminata: comparative therapeutic efficacy between trichloroacetic acid vs. trichloroacetic acid associated to levamisole. *Dermatol Perú* 2009; **19**:114-21
75. Arany I, Tyring SK, Stanley MA, et al. Enhancement of the innate and cellular immune response in patients with genital warts treated with topical imiquimod cream 5%. *Antiviral Res* 1999; **43**:55-63
76. Armstrong DKB, Maw RD, Dinsmore WW, et al. Combined therapy trial with interferon alpha-2a and ablative therapy in the treatment of anogenital warts. *Genitourin Med* 1996; **72**:103-7
77. Bar-Am A, Lessing JB, Niv J, et al. High- and low-power CO2 lasers. Comparison of results for three clinical indications. *J Reprod Med* 1993; **38**:455-8
78. Bashi SA. Cryotherapy versus podophyllin in the treatment of genital warts. *Int J Dermatol*



1985; **24**:535-6

79. Beutner KR, Spruance SL, Hougham AJ, et al. Treatment of genital warts with an immune-response modifier (imiquimod). *J Am Acad Dermatol* 1998; **38**:230-9
80. Beutner KR, Edwards L, Owens ML, et al. Comparison of two vehicle-controlled trials of imiquimod 5% cream for the treatment of external genital warts. Poster presented at: 35th european society for dermatological research; 1998 May 7-10; Cologne.
81. Botacini G. Therapeutic of cervicovaginal human papillomavirus infection. Randomized study with four drugs. *J Bras Ginecol* 1993; **103**:205–10
82. Buck HW, Fortier M, Knudsen J, et al. Imiquimod 5% cream in the treatment of anogenital warts in female patients. *Int J Gynaecol Obstet* 2002; **77**:231-8
83. Chen HC, Fang H, Wang YN, et al. Photodynamic therapy with aminolevulinic acid (ALA-PDT) for urethral condyloma acuminatum: a clinical observation. *J Clin Dermatol* 2009; **38**:193-4
84. Chopra K, Lee P, Tyring SK, et al. Vehicle-controlled study investigating the mechanism of action of 5% imiquimod cream applied three times a week for the treatment of patients with genital/perianal warts. Abstract presented at: 19th world congress of dermatology; 1997 Jun 15-20; Sydney. *Australas J Dermatol* 1997; **38**:113–4
85. The Condyloma International Collaborative Study Group. A comparison of interferon alfa-2a and podophyllin in the treatment of primary condylomata acuminata. *Genitourin Med* 1991; **67**:394-9
86. The Condyloma International Collaborative Study Group. Randomized placebo-controlled double-blind combined therapy with laser surgery and systemic interferon-alpha 2a in the treatment of anogenital condylomata acuminatum. *J Infect Dis* 1993; **167**:824-9
87. Damstra RJ and Vloten WA. Treatment of condylomata acuminata: a controlled study of 64 patients. *J Dermatol Surg Oncol* 1991; **17**:273-6
88. Davidson-Parker J, Dinsmore W, Khan MH, et al. Immunotherapy of genital warts with inosine pranobex and conventional treatment: double blind placebo controlled study. *Genitourin Med* 1988; **64**:383-6
89. Dinsmore W, Jordan J, O'Mahony C, et al. Recombinant human interferon-beta in the treatment of condylomata acuminata. *Int J STD AIDS* 1997; **8**:622-8

90. Douglas JM, Eron LJ, Judson FN, et al. A randomized trial of combination therapy with intralesional interferon alpha 2b and podophyllin versus podophyllin alone for the therapy of anogenital warts. *J Infect Dis* 1990; **162**:52-9
91. Edwards L. Imiquimod in clinical practice. *Australas J Dermatol* 1998; **39**:14-6
92. Edwards L, Ferenczy A, Eron L, et al. Multi-center safety and efficacy trial evaluating three times per week application of 1% and 5% topical imiquimod for the treatment of genital/perianal warts. *Antiviral Research* 1995; **26**:A244
93. Eron LJ, Alder MB, O'Rourke JM, et al. Recurrence of condylomata acuminata following cryotherapy is not prevented by systemically administered interferon. *Genitourin Med* 1993; **69**:91-3
94. Ferenczy A. Immune response modifiers: Imiquimod. *J Obstet Gynaecol* 1998; **18**:S76-8
95. Ferenczy A, Behelak Y, Haber G, et al. Treating vaginal and external anogenital condylomas with electrosurgery vs CO2 laser ablation. *J Gynecol Surg* 1995; **11**:41-50
96. Fife KH, Ferenczy A, Douglas JM, et al. Treatment of external genital warts in men using 5% imiquimod cream applied three times a week, once daily, twice daily, or three time a day. *Sex Transm Dis* 2001; **28**:226-31
97. Fleshner PR and Freilich MI. Adjuvant interferon for anal condyloma. A prospective, randomized trial. *Dis Colon Rectum* 1994; **37**:1255-9
98. Fouere S, Dupin N, Halioua B, et al. Etude de phase II de tolerance, de pharmacocinétique et d'efficacité d'AP611074, antiviral spécifique de PVH6 et 11 dans le traitement topique des condylomes anogénitaux. *Ann Dermatol Venereol* 2014; **141**:S303-4.
99. Garland SM, Waddel R, Mindel A, et al. An open-label phase II pilot study investigating the optimal duration of imiquimod 5% cream for the treatment of external genital warts in women. *Int J STD AIDS* 2006; **17**:448-452
100. Garland SM, Sellors JW, Wikstrom A, et al. Imiquimod 5% cream is a safe and effective self-applied treatment for anogenital warts-results of an open-label, multicentre phase IIIB trial. *Int J STD AIDS* 2001; **12**:722-9
101. Goh CL, Ang CB, Chan RKW, et al. Comparing treatment response and complications between podophyllin 0.5%/0.25% in ethanol vs podophyllin 25% in tincture Benzoin for

- penile warts. *Singapore Med J* 1998; **39**:17-9
102. Gollnick H, Barasso R, Jappe U, et al. Safety and efficacy of imiquimod 5% cream in the treatment of penile genital warts in circumcised men when applied three times weekly or once per day. *Int J of STD AIDS* 2001; **12**:22-8
  103. Gross G, Roussaki A, Baur S, et al. Systemically administered interferon alfa-2a prevents recurrence of condylomata acuminata following CO<sub>2</sub>-laser ablation. The influence of the cyclic low dose therapy regimen. Results of multicentre double-blind placebo-controlled clinical trial. *Genitourin Med* 1996; **72**:71
  104. Gross G, Rogozinski T, Schöfer H, et al. Recombinant interferon beta gel as an adjuvant in the treatment of recurrent genital warts: results of a placebo-controlled double-blind study in 120 patients. *Dermatology* 1998; **196**:330-4
  105. Handley JM, Horner T, Maw RD, et al. Subcutaneous interferon alpha 2a combined with cryotherapy vs cryotherapy alone in the treatment of primary anogenital warts: a randomized observer blind placebo controlled study. *Genitourin Med* 1991; **67**:297-302
  106. Handley JM, Maw RD, Horner T, et al. A placebo controlled observer blind immunocytochemical and histologic study of epithelium adjacent to anogenital warts in patients treated with systemic interferon alpha in combination with cryotherapy or cryotherapy alone. *Genitourin Med* 1992; **68**:100-5
  107. Hohenleutner U, Landthaler M, Braun-Falco O. Postoperative adjuvant therapy with interferon alfa-2B following laser surgery of condylomata acuminata. *Hautarzt* 1990; **41**:545-8
  108. Hoy SM. Polyphenon E 10% Ointment in immunocompetent adults with external genital and perianal warts. *Am J Clin Dermatol* 2012; **13**:275-281
  109. IRCT2017011531949N1. Comparing the effects of Shallomin and Podophyllin solution 25% in treatment of genital HPV warts in women
  110. IRCT2015090514386N1. Comparison of the effectiveness of two common treatments for genital warts
  111. IRCT2013111015364N1. Comparative effect treatment of ficus carica latex cream vs. podophyllin in treatment of genital warts
  112. IRC 201202138992N1. Comparison of the efficacy of garlic extracts 10% and cryotherapy

(liquid nitrogen) in the treatment of the genital warts in men

113. IRCT201412207848N1 Asadi N, Hemmati E, Namazi G, et al. A comparative study of potassium hydroxide versus CO<sub>2</sub> laser vaporization in the treatment of female genital warts: a controlled clinical trial. *Int J Community Based Nurs Midwifery* 2016; **4**:274-82
114. Jardine D, Lu J, Pang J, et al. A randomized trial of immunotherapy for persistent genital warts. *Human Vaccin Immunother* 2012; **8**:623-9
115. Klutke JJ and Bergman A. Interferon as an adjuvant treatment for genital condyloma acuminatum. *Int J Gynecol Obst* 1995; **49**:171-4
116. Lafuma A, Monsonogo J, Moyal-Barracco M, et al. A model-based comparison of cost effectiveness of imiquimod versus podophyllotoxin for the treatment of external anogenital warts in France. *Ann Dermatol Venereol* 2003. **130**:731-6
117. Landthaler M, Frosschl M. Zur behandlung von condylomata acuminata mit podophyllotoxin. *Dt Dermatol* 1987; **11**:1223-5
118. Langley PC. A cost-effectiveness analysis of sinecatechins in the treatment of external genital warts. *J Med Econ* 2010; **13**:1-7
119. Lassus A, Haukka K, Forsstrom S. Podophyllotoxin for treatment of genital warts in males. A comparison with conventional podophyllin therapy. *Eur J Sex Transm Dis* 1984; **2**:31-3
120. Li J, Yi Y, Zhu W. Three stages of 5-aminolevulinic acid-photodynamic therapy for condyloma acuminatum of external urethral meatus. *Zhong Nan Xue Xue Bao Yi Xue Ban* 2011; **36**:1115-9
121. Liang J, Lu XN, Tang H, et al. Evaluation of photodynamic therapy using topical aminolevulinic acid hydrochloride in the treatment of condylomata acuminata: a comparative, randomized clinical trial. *Photodermatol Photoimmunol Photomed* 2009; **25**:293-7
122. Liu H, Zhang P, An X, et al. CO<sub>2</sub> laser plus photodynamic therapy versus CO<sub>2</sub> laser in the treatment of condyloma acuminatum: a randomized comparative study. *J of Innov Opt Heal Sci* 2012; **7**:1150008-1-7
123. Maiti H, Haye KR. Self-treatment of condylomata acuminata with podophyllin resin. *Practitioner* 1985; **229**:37-9
124. Maw RD, Kinghorn GR, Bowman CA, et al. Imiquimod 5% cream is an acceptable

- treatment option for external anogenital warts in uncircumcised males. *J Eur Acad Dermatol Venereol* 2002; **16**:58-62
125. Mazurkiewicz W and Jablonska S. Clinical efficacy of condylone (0,5% podophyllotoxin) solution and cream versus podophyllin in the treatment of external condylomata acuminata. *J of Dermatol Treatment* 1990; **1**:123-5
  126. Meltzer SM, Bradley JM, Tewari KS. Green tea catechins for treatment of external genital warts. *Am J Obstet Gynecol* 2009; **200**:233.e1-e7.
  127. Metewea B, El-Nashar AR, Kamel I, et al. Application of viable bacilli calmette-guerin topically as a potential therapeutic modality in condylomata acuminata: a placebo-controlled study. *Urology* 2005; **65**:247-50
  128. Mi X, Chai W, Zheng H, et al. A randomized clinical comparative study of cryotherapy plus photodynamic therapy vs. cryotherapy in the treatment of multiples condylomata acuminata. *Photodermatol Photoimmunol Photomed* 2011; **27**:176-80.
  129. Mistrangelo M, Cornaglia S, Pizzio M et al. Immunostimulation to reduce recurrence after surgery for anal condyloma acuminata: a prospective randomized controlled trial. *Colorectal Dis* 2010; **12**:799-03
  130. Monsonego J, Cessot G, Ince SE, et al. Randomized double-blind trial of recombinant interferon-beta for condyloma acuminatum. *Genitourin Med* 1996; **72**:111-4
  131. NCT00674739. Safety and effectiveness study of imiquimod creams in the treatment of external genital warts
  132. NCT00735462. Phase 3 Study of imiquimod creams in the treatment of external genital warts
  133. NCT02520986. Carbon dioxide laser vs. electrocoagulation for the therapy of condyloma
  134. NCT02724254. A study to assess the safety, tolerability, pharmacokinetics and efficacy of twice daily topical applications of AP611074 5% Gel for up to 16 Weeks in condyloma patients
  135. NCT01796821. Efficacy and safety profiles of SR-T100 gel on external genital warts/condyloma acuminata(EGWs)
  136. NCT03153566. Comparison between tuberculin vaccine and cryotherapy in genital wart patients

137. NCT01943630. Safety and efficacy double blind vehicle controlled study of 15% AS101 gel to treat external genital warts
138. NCT02849262. Pharmacodynamics, safety and efficacy of topical omiganan in patients with external genital warts
139. NCT02462187. Topical NVN1000 for the treatment of external genital and perianal warts
140. NCT02482428. Efficacy and tolerability of topical LFX453 for external genital warts
141. NCT02147353. Treatment of external genital warts with cryotherapy and sinecatechins 15% ointment
142. NCT02015260. A trial of the efficacy and safety of topical nitric oxide in patients with anogenital warts
143. Nieminen P, Aho M, Lehtinen M, et al. Treatment of genital HPV infection with carbon dioxide laser and systemic interferon alpha-2b. *Sex Transm Dis* 1994; **21**:65-9
144. Owens ML, Edwards L, Ferenczy A, et al. Imiquimod 5% cream is effective and safe in the treatment of genital/ perianal warts. Abstract presented at 8th Congress of the European Academy of Dermatology and Venereology. 1999 Sept Oct 29-3; Amsterdam. *J Eur Acad Dermatol Venereol* 1999; **12**:S348
145. Potocnik M, Bartenjev I. Genital warts treatment – ultrapulse CO<sub>2</sub> or argon laser. *Australas J Dermatol* 1997; **38**:30-1
146. Rosen T, Nelson A, Ault K. Imiquimod Cream 2.5% and 3.75% applied once daily to treat external genital warts in men. *Cutis* 2015; **96**:277-82
147. Sauder DN, Skinner RB, Fox TL, et al. Topical imiquimod 5% cream as an effective treatment for external genital warts in different patient populations. *Sex Transm Dis* 2003; **30**:124-8
148. Sharma N, Sharma S, Singhal C. A comparative study of liquid nitrogen cryotherapy as monotherapy versus in combination with podophyllin in the treatment of condyloma acuminata. *J Clin Diagn Res* 2017; **11**:WC01-WC05
149. Shi H, Zhang X, Ma C, et al. Clinical analysis of five methods used to treat condylomata acuminata. *Dermatology* 2013; **227**:338-45
150. Stefanaki C, Fasoulaki X, Kouris A, et al. A randomized trial of efficacy of beta-sitosterol and its glucoside as adjuvant to cryotherapy in the treatment of anogenital warts. *J*

*Dermatolog Treat* 2015; **26**:139-42

151. Stellato G, Paavonen J, Nieminen P, et al. Diagnostic phase antibody response to the human papillomavirus type 16 E2 protein is associated with successful treatment of genital HPV lesions with systemic interferon  $\alpha$ -2b. *Clin Diagn Virol* 1997; **7**:167-72
152. Swinehart JM, Skinner RB, McCarty JM, et al. Development of intralesional therapy with fluorouracil/adrenaline injectable gel for management of condylomata acuminata: two phase II clinical studies. *Genitourin Med* 1997; **73**:481-7
153. Syed TA. Imiquimod 5% versus podophyllotoxin 0.5% in cream for the treatment of genital warts. A placebo-controlled, double-blind, comparative study. Abstract. *Ann Dermatol Venereol* 2002;IC1612
154. Syed TA, Lundin S, Cheema KM, et al. Human leukocyte interferon- $\alpha$  in cream, for the treatment of genital warts in asian women: a placebo-controlled, double-blind study. *Clin Investig* 1994; **72**:870-3
155. Syed TA and Lundin S. Topical treatment of penile condylomata acuminata with podophyllotoxin 0.3% solution, 0.3% cream and 0.15% cream: a comparative open study. *Dermatology*. 1993; **187**:30-3
156. Trofatter KF, Ferenczy A, Fife KH, HPV Study Group. Increased frequency of dosing imiquimod 5% cream in the treatment of external genital warts in women. *Int J Gynaecol Obstet* 2002; **76**:2191-3
157. Tuncel A, Erbagci Z, Ozgoztas AO. An open-label comparative study to evaluate the efficacy and tolerability of imiquimod 5% cream alone and combined with cryotherapy in the treatment of recalcitrant anogenital warts. Abstract presented at: 14th congress of the european academy of dermatology and venereology; 2005 Oct 12-15; London. *J Eur Acad Dermatol Venereol* 2005; **19**:361
158. Urban G, Stentella P, Baiocco E, et al. Post-partum recurrency rate for clinical manifestation of human papillomavirus in the ano-genital tract after second trimester laser CO2 treatment: a randomized trial. Abstract presented at society for maternal fetal medicine. 2006. *Am J Obstet Gynaecol*.S194
159. Vesterinen E, Meyer B, Purola E, et al. Treatment of vaginal flat condyloma with interferon cream. *Lancet* 1984; **323**:157

160. Viazis N, Vlachogiannakos J, Vasiliadis K, et al. Earlier eradication of intra-anal warts with argon plasma coagulator combined with imiquimod cream compared with argon plasma laser alone: a prospective, randomized trial. *Dis Colon Rectum* 2007; **50**:2173–2179
161. Von Krogh G. Podophyllotoxin for condylomata acuminata eradication. Clinical and experimental comparative studies on podophyllum lignans, colchicine and 5-fluorouracil. *Acta Derm Venereol Suppl* 1981; **98**:1-48
162. Xu PH, Yuan DF, Wu ZZ, et al. Photodynamic therapy reducing recurrence of condyloma acuminatum: a clinical study. *J Clin Dermatol* 2009; **38**:334-35
163. Yaghoobi R, Jalal-Lofti S, Pazyar N, et al. Comparison of efficacy of 5% potassium hydroxide solution versus cryotherapy in the treatment of male genital wart: a randomized clinical trial. *G Ital Dermatol Venereol* 2014; **149**:149-50
164. Yin G, Yu J, Li D. Immune modulatory and therapeutic effect of lentinan on condyloma acuminatum. *Zhongguo Zhong Xi Yi Jie He Za Zhi* 1998; **18**:665-7
165. Yu X, Ye Z, Yang W, et al. Efficacy of local injection of bacillus calmette-guerin polysaccharide nucleic acid following CO2 laser resection on condyloma acuminatum. *Zhonghua Nan Ke Xue*. 2004; **10**:117-21
166. Zarcone R, carfora E, Bellini P, et al. Drug therapy of condylomata acuminata. *Minerva Ginecol* 1996; **48**:299-302
167. Zervoudis S, Iatrakis G, Peitsidis P, et al. Complementary treatment with oral pidotimod plus vitamin C after laser vaporization for female genital warts: a prospective study. *J Med Life* 2010; **3**:286-8
